# Supplementary material for: Cerebral near-infrared spectroscopy monitoring (NIRS) in children and adults: a systematic review with meta-analysis
Source: PubMed Central journal article supplement (PMC11502593; doi:10.1038/s41390-022-01995-z), 2022-02-22
Supplement: 41390_2022_1995_MOESM1_ESM.pdf [file 41390_2022_1995_MOESM1_ESM.pdf]

# Electronic supplementary material

*Supplement to*

The clinical effect of cerebral near-infrared spectroscopy monitoring (NIRS) in children and adults: a systematic review with meta-analysis and Trial Sequential Analysis

*Hansen et. al*

|                                                                                                |                   |
|------------------------------------------------------------------------------------------------|-------------------|
| <b>Appendix A: PRISMA Checklist.....</b>                                                       | <b>p 2 to 3</b>   |
| <b>Appendix B: Search strategy.....</b>                                                        | <b>p 4 to 4</b>   |
| <b>Appendix C: Characteristics of trials, data extraction and risk of bias assessment.....</b> | <b>p 5 to 5</b>   |
| <b>Appendix D: Statistical analyses.....</b>                                                   | <b>p 6 to 41</b>  |
| <b>Appendix E: Datafile for statistical analysis program.....</b>                              | <b>p 42 to 42</b> |
| <b>Appendix F: Synthax for STATA/SE 17.0.....</b>                                              | <b>p 43 to 43</b> |
| <b>Appendix G: Correspondence with trialists.....</b>                                          | <b>p 44 to 44</b> |

## Appendix A: PRISMA checklist

| Section/topic                      | #  | Checklist item                                                                                                                                                                                                                                                                                              | Reported on page #  |
|------------------------------------|----|-------------------------------------------------------------------------------------------------------------------------------------------------------------------------------------------------------------------------------------------------------------------------------------------------------------|---------------------|
| <b>TITLE</b>                       |    |                                                                                                                                                                                                                                                                                                             |                     |
| Title                              | 1  | Identify the report as a systematic review, meta-analysis, or both.                                                                                                                                                                                                                                         | 1                   |
| <b>ABSTRACT</b>                    |    |                                                                                                                                                                                                                                                                                                             |                     |
| Structured summary                 | 2  | Provide a structured summary including, as applicable: background; objectives; data sources; study eligibility criteria, participants, and interventions; study appraisal and synthesis methods; results; limitations; conclusions and implications of key findings; systematic review registration number. | 5                   |
| <b>INTRODUCTION</b>                |    |                                                                                                                                                                                                                                                                                                             |                     |
| Rationale                          | 3  | Describe the rationale for the review in the context of what is already known.                                                                                                                                                                                                                              | 6-7                 |
| Objectives                         | 4  | Provide an explicit statement of questions being addressed with reference to participants, interventions, comparisons, outcomes, and study design (PICOS).                                                                                                                                                  | 7                   |
| <b>METHODS</b>                     |    |                                                                                                                                                                                                                                                                                                             |                     |
| Protocol and registration          | 5  | Indicate if a review protocol exists, if and where it can be accessed (e.g., Web address), and, if available, provide registration information including registration number.                                                                                                                               | 7                   |
| Eligibility criteria               | 6  | Specify study characteristics (e.g., PICOS, length of follow-up) and report characteristics (e.g., years considered, language, publication status) used as criteria for eligibility, giving rationale.                                                                                                      | 7-8                 |
| Information sources                | 7  | Describe all information sources (e.g., databases with dates of coverage, contact with study authors to identify additional studies) in the search and date last searched.                                                                                                                                  | 9                   |
| Search                             | 8  | Present full electronic search strategy for at least one database, including any limits used, such that it could be repeated.                                                                                                                                                                               | 9 (and appendix)    |
| Study selection                    | 9  | State the process for selecting studies (i.e., screening, eligibility, included in systematic review, and, if applicable, included in the meta-analysis).                                                                                                                                                   | 9                   |
| Data collection process            | 10 | Describe method of data extraction from reports (e.g., piloted forms, independently, in duplicate) and any processes for obtaining and confirming data from investigators.                                                                                                                                  | 9                   |
| Data items                         | 11 | List and define all variables for which data were sought (e.g., PICOS, funding sources) and any assumptions and simplifications made.                                                                                                                                                                       | 9-10 (and appendix) |
| Risk of bias in individual studies | 12 | Describe methods used for assessing risk of bias of individual studies (including specification of whether this was done at the study or outcome level), and how this information is to be used in any data synthesis.                                                                                      | 10                  |
| Summary measures                   | 13 | State the principal summary measures (e.g., risk ratio, difference in means).                                                                                                                                                                                                                               | 10-11               |
| Synthesis of results               | 14 | Describe the methods of handling data and combining results of studies, if done, including measures of consistency (e.g., $I^2$ ) for each meta-analysis.                                                                                                                                                   | 10-11               |

|                               |    |                                                                                                                                                                                                          |                                                         |
|-------------------------------|----|----------------------------------------------------------------------------------------------------------------------------------------------------------------------------------------------------------|---------------------------------------------------------|
| Risk of bias across studies   | 15 | Specify any assessment of risk of bias that may affect the cumulative evidence (e.g., publication bias, selective reporting within studies).                                                             | 11                                                      |
| Additional analyses           | 16 | Describe methods of additional analyses (e.g., sensitivity or subgroup analyses, meta-regression), if done, indicating which were pre-specified.                                                         | 11                                                      |
| <b>RESULTS</b>                |    |                                                                                                                                                                                                          |                                                         |
| Study selection               | 17 | Give numbers of studies screened, assessed for eligibility, and included in the review, with reasons for exclusions at each stage, ideally with a flow diagram.                                          | 11-14                                                   |
| Study characteristics         | 18 | For each study, present characteristics for which data were extracted (e.g., study size, PICOS, follow-up period) and provide the citations.                                                             | 11-14 (and appendix)                                    |
| Risk of bias within studies   | 19 | Present data on risk of bias of each study and, if available, any outcome level assessment (see item 12).                                                                                                | 14-20 (and appendix)                                    |
| Results of individual studies | 20 | For all outcomes considered (benefits or harms), present, for each study: (a) simple summary data for each intervention group (b) effect estimates and confidence intervals, ideally with a forest plot. | 14-20. Data extraction for individ. studies in appendix |
| Synthesis of results          | 21 | Present results of each meta-analysis done, including confidence intervals and measures of consistency.                                                                                                  | 14-20                                                   |
| Risk of bias across studies   | 22 | Present results of any assessment of risk of bias across studies (see Item 15).                                                                                                                          | 14-20 (and appendix)                                    |
| Additional analysis           | 23 | Give results of additional analyses, if done (e.g., sensitivity or subgroup analyses, meta-regression [see Item 16]).                                                                                    | 14-20 (and appendix)                                    |
| <b>DISCUSSION</b>             |    |                                                                                                                                                                                                          |                                                         |
| Summary of evidence           | 24 | Summarize the main findings including the strength of evidence for each main outcome; consider their relevance to key groups (e.g., healthcare providers, users, and policy makers).                     | 20-22                                                   |
| Limitations                   | 25 | Discuss limitations at study and outcome level (e.g., risk of bias), and at review-level (e.g., incomplete retrieval of identified research, reporting bias).                                            | 20-22                                                   |
| Conclusions                   | 26 | Provide a general interpretation of the results in the context of other evidence, and implications for future research.                                                                                  | 23                                                      |
| <b>FUNDING</b>                |    |                                                                                                                                                                                                          |                                                         |
| Funding                       | 27 | Describe sources of funding for the systematic review and other support (e.g., supply of data); role of funders for the systematic review.                                                               | 3                                                       |

## Appendix B: Search strategy

|                                                                                                                                                                                                                                                                                                                                                                                                                                                                                                                                                                                                                                                                                                                             |
|-----------------------------------------------------------------------------------------------------------------------------------------------------------------------------------------------------------------------------------------------------------------------------------------------------------------------------------------------------------------------------------------------------------------------------------------------------------------------------------------------------------------------------------------------------------------------------------------------------------------------------------------------------------------------------------------------------------------------------|
| <p><b>PubMed (November 2020)</b></p>                                                                                                                                                                                                                                                                                                                                                                                                                                                                                                                                                                                                                                                                                        |
| <p>((((((((((((cerebral oxygen) OR (cerebral oximetry)) OR (cerebral saturation)) OR (cerebral oxymeter)) OR (cerebral tissue oxygen)) OR (near-infrared spectroscopy)) OR (cerebral oxygenation)) OR (brain oxygen)) OR (cerebral NIRS)) OR (near-infrared refracted spectroscopy)) OR (cerebral near infrared spectroscopy)) OR (near infrared spectroscopy)) AND ((((((randomized controlled trial) OR (randomised controlled trial)) OR (randomized clinical trial)) OR (randomised clinical trial)) OR (randomized)) OR (randomised))) AND ((((((randomized controlled trial) OR (randomised controlled trial)) OR (randomized clinical trial)) OR (randomised clinical trial)) OR (randomized)) OR (randomised)))</p> |
| <p><b>MEDLINE (Ovid) (March 2021)</b></p>                                                                                                                                                                                                                                                                                                                                                                                                                                                                                                                                                                                                                                                                                   |
| <ol style="list-style-type: none"> <li>1. exp Spectroscopy, Near-Infrared/</li> <li>2. (((near adj infrared) or nir) and (spectroscop* or spectromet*)).ti,ab.</li> <li>3. 1 or 2</li> <li>4. exp Cerebrovascular Circulation/</li> <li>5. exp Oximetry/</li> <li>6. ((cerebr* and (nir* or oxygen* or saturation* or oximetr* or perfusion*)) or (oxygen and (brain or saturation*))).ti,ab.</li> <li>7. 4 or 5 or 6</li> <li>8. 3 or 7</li> <li>9. (randomized controlled trial or controlled clinical trial).pt. or clinical trials as topic.sh. or trial.ti.</li> <li>10. (random* or blind*).ti,ab.</li> <li>11. 8 and (9 or 10)</li> <li>12. 11 not (exp animals/ not humans.sh.)</li> </ol>                          |

## **Appendix C: Characteristics of trials, data extraction and risk of bias assessment**

Please go to

LINK FIGSHARE: <https://figshare.com/s/a9ef63687962c4e686a8>

For full access to extracted data, risk of bias assessment and characteristics of included and excluded trials.

## Appendix D: Statistical analyses

### Content declaration

|                                                                                                                                                                          |    |
|--------------------------------------------------------------------------------------------------------------------------------------------------------------------------|----|
| All-cause mortality .....                                                                                                                                                | 8  |
| Primary analysis .....                                                                                                                                                   | 8  |
| Subgroup analyses .....                                                                                                                                                  | 9  |
| Clinical setting (cardiac surgery compared to neonatal intensive care compared to neurocritical care compared to non-cardiac surgery).....                               | 9  |
| Industry funding (funding not reported compared to industry funded compared to no industry funding) .....                                                                | 10 |
| Cerebral NIRS monitoring in the control group (blinded cerebral NIRS monitoring in the control group compared to no cerebral NIRS monitoring in the control group) ..... | 11 |
| Trial Sequential Analysis .....                                                                                                                                          | 12 |
| Bayes factor .....                                                                                                                                                       | 12 |
| Sensitivity analyses .....                                                                                                                                               | 13 |
| Best-worst case analysis .....                                                                                                                                           | 13 |
| Worst-best case analysis.....                                                                                                                                            | 13 |
| Funnel plot .....                                                                                                                                                        | 14 |
| Moderate or severe, persistent, cognitive or neurological deficit, at maximal follow-up .....                                                                            | 15 |
| Primary analysis .....                                                                                                                                                   | 15 |
| Subgroup analyses .....                                                                                                                                                  | 16 |
| Risk of bias (high compared to low).....                                                                                                                                 | 16 |
| Clinical setting (cardiac surgery compared to neonatal intensive care compared to neurocritical care compared to non-cardiac surgery).....                               | 17 |
| Industry funding (funding not reported compared to industry funded compared to no industry funding) .....                                                                | 18 |
| Cerebral NIRS monitoring in the control group (blinded cerebral NIRS monitoring in the control group compared to no cerebral NIRS monitoring in the control group) ..... | 19 |
| Trial Sequential Analysis .....                                                                                                                                          | 20 |
| Bayes factor .....                                                                                                                                                       | 20 |
| Sensitivity analyses .....                                                                                                                                               | 21 |
| Best-worst case analysis .....                                                                                                                                           | 21 |
| Worst-best case analysis.....                                                                                                                                            | 21 |
| Heterogeneity (excluding Mohandas et al 2013) .....                                                                                                                      | 22 |
| Proportion of participants with one or more serious adverse events.....                                                                                                  | 23 |
| Primary analysis .....                                                                                                                                                   | 23 |

|                                                                                                                                                                                 |    |
|---------------------------------------------------------------------------------------------------------------------------------------------------------------------------------|----|
| <b>Subgroup analyses</b> .....                                                                                                                                                  | 25 |
| <b>Risk of bias (high compared to low)</b> .....                                                                                                                                | 25 |
| <b>Clinical setting (cardiac surgery compared to neonatal intensive care compared to neurocritical care compared to non-cardiac surgery)</b> .....                              | 26 |
| <b>Industry funding (funding not reported compared to industry funded compared to no industry funding)</b> .....                                                                | 27 |
| <b>Cerebral NIRS monitoring in the control group (blinded cerebral NIRS monitoring in the control group compared to no cerebral NIRS monitoring in the control group)</b> ..... | 28 |
| <b>Trial Sequential Analysis</b> .....                                                                                                                                          | 29 |
| <b>Bayes factor</b> .....                                                                                                                                                       | 29 |
| <b>Sensitivity analyses</b> .....                                                                                                                                               | 30 |
| <b>Best-worst case analysis</b> .....                                                                                                                                           | 30 |
| <b>Worst-best case analysis</b> .....                                                                                                                                           | 31 |
| <b>Heterogeneity (excluding Mohandas et al. 2013)</b> .....                                                                                                                     | 32 |
| <b>Funnel plot</b> .....                                                                                                                                                        | 33 |
| <b>Mild, moderate or severe, temporary or persistent, cognitive or neurological deficit</b> .....                                                                               | 34 |
| <b>Primary analysis</b> .....                                                                                                                                                   | 34 |
| <b>Sensitivity analysis</b> .....                                                                                                                                               | 36 |
| <b>Heterogeneity (excluding Mohandas et al. 2013)</b> .....                                                                                                                     | 36 |
| <b>Brain damage on imaging at maximal follow-up</b> .....                                                                                                                       | 37 |
| <b>Primary analysis</b> .....                                                                                                                                                   | 37 |
| <b>Proportion of participants with one or more adverse events</b> .....                                                                                                         | 38 |
| <b>Primary analysis</b> .....                                                                                                                                                   | 38 |
| <b>Any evidence of a negative impact on the brain</b> .....                                                                                                                     | 39 |
| <b>Primary analysis</b> .....                                                                                                                                                   | 39 |
| <b>Sensitivity analysis</b> .....                                                                                                                                               | 41 |
| <b>Heterogeneity (excluding Mohandas et al. 2013)</b> .....                                                                                                                     | 41 |

# All-cause mortality

## Primary analysis

Figure S1 – fixed effect

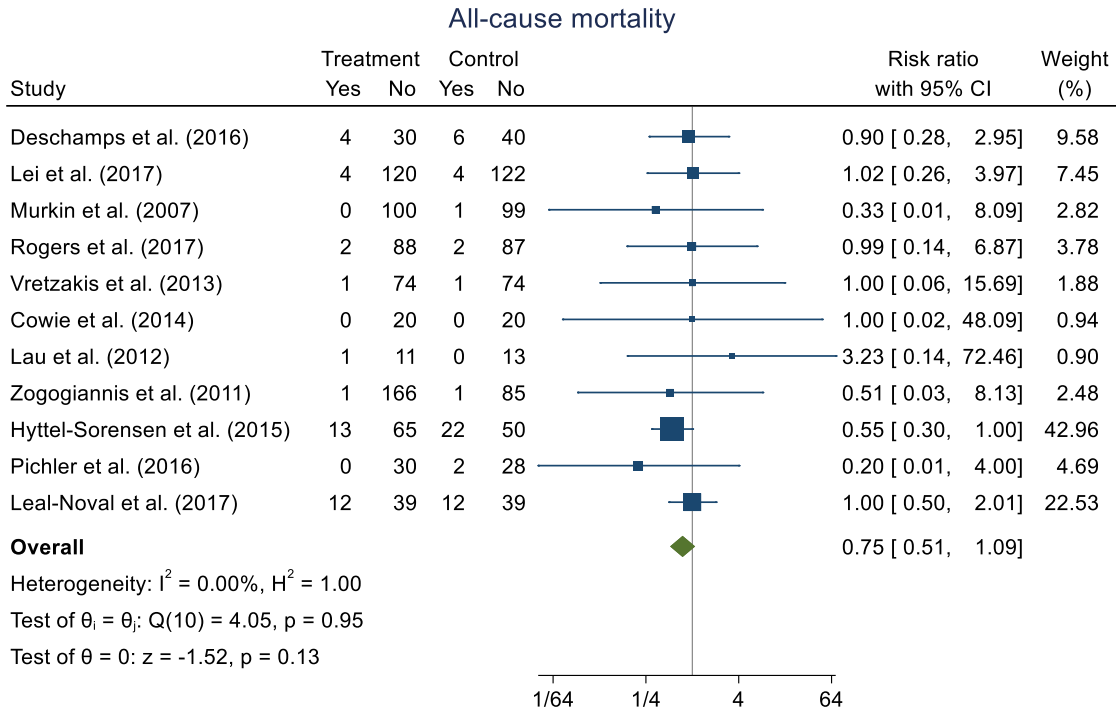

Fixed-effects Mantel–Haenszel model

Figure S2 – random effects

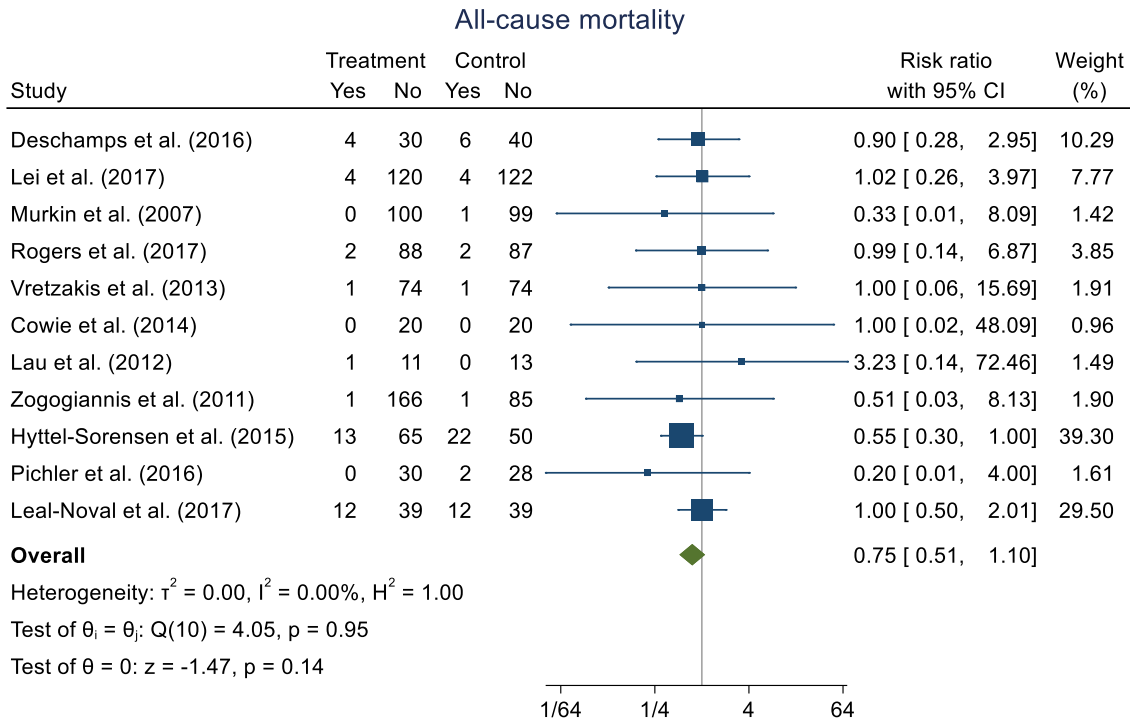

Random-effects DerSimonian–Laird model



## Subgroup analyses

### Clinical setting (cardiac surgery compared to neonatal intensive care compared to neurocritical care compared to non-cardiac surgery)

Figure S3

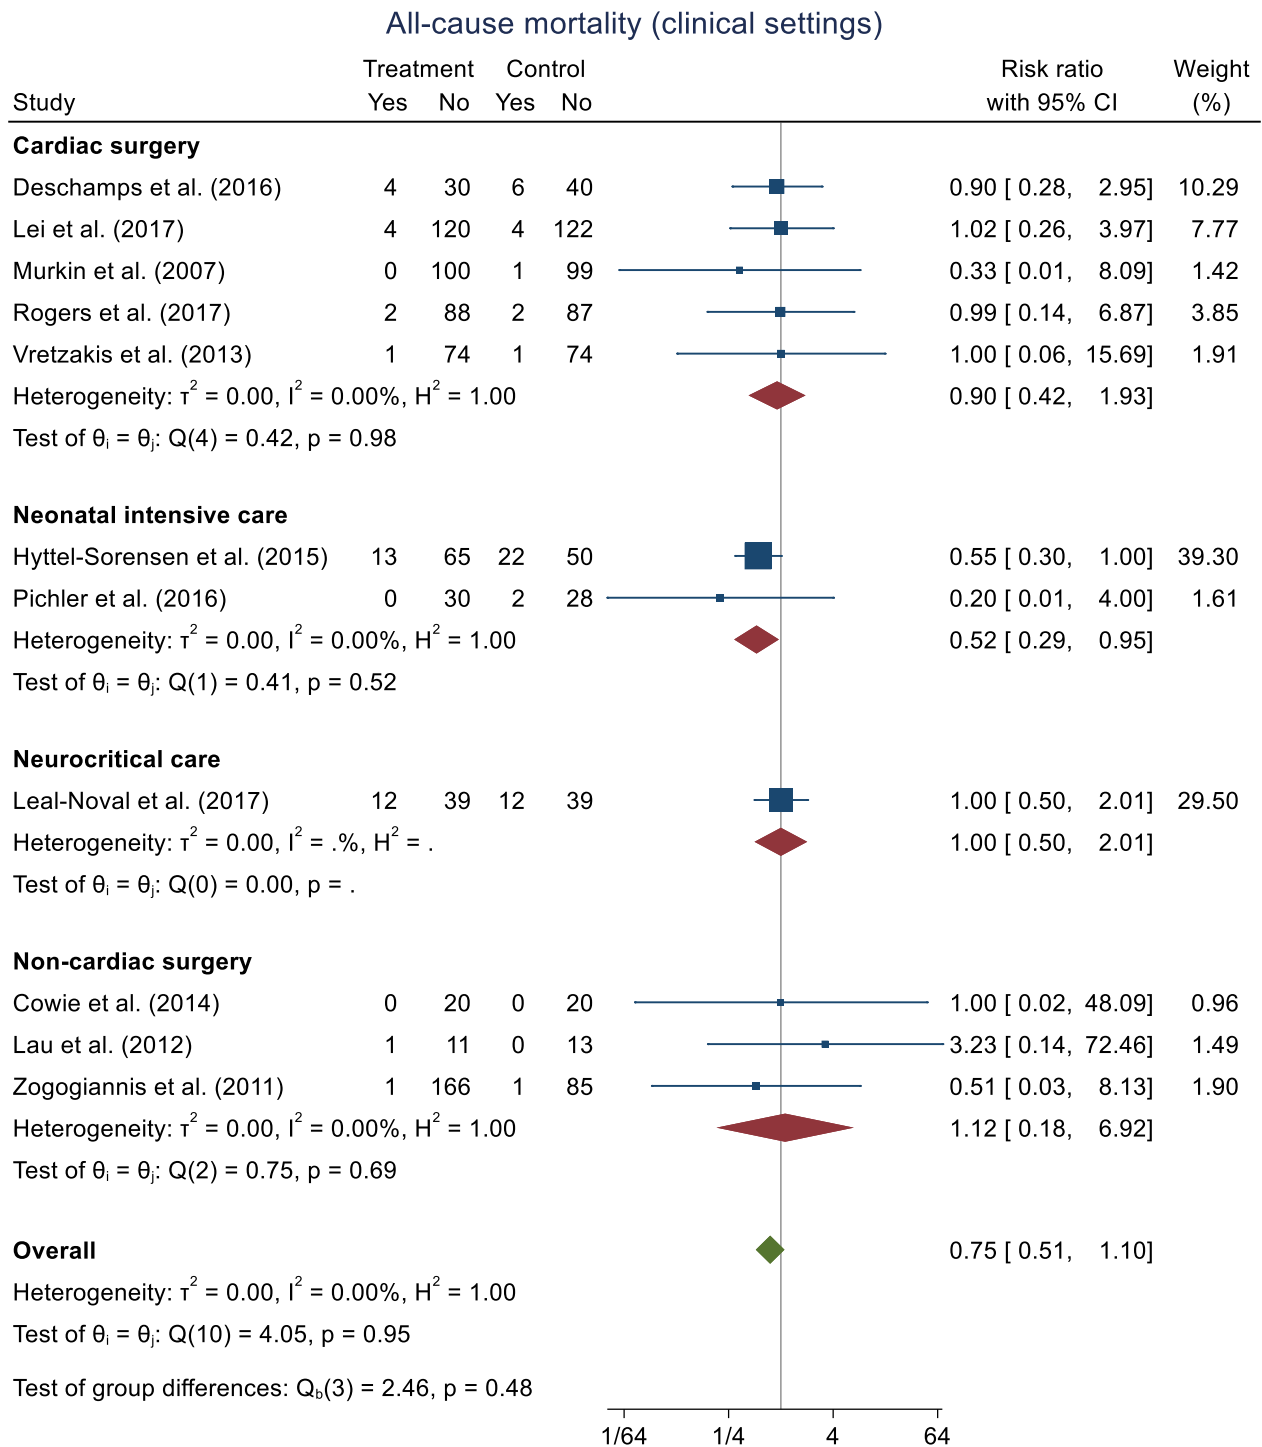

Random-effects DerSimonian–Laird model

## Industry funding (funding not reported compared to industry funded compared to no industry funding)

Figure S4

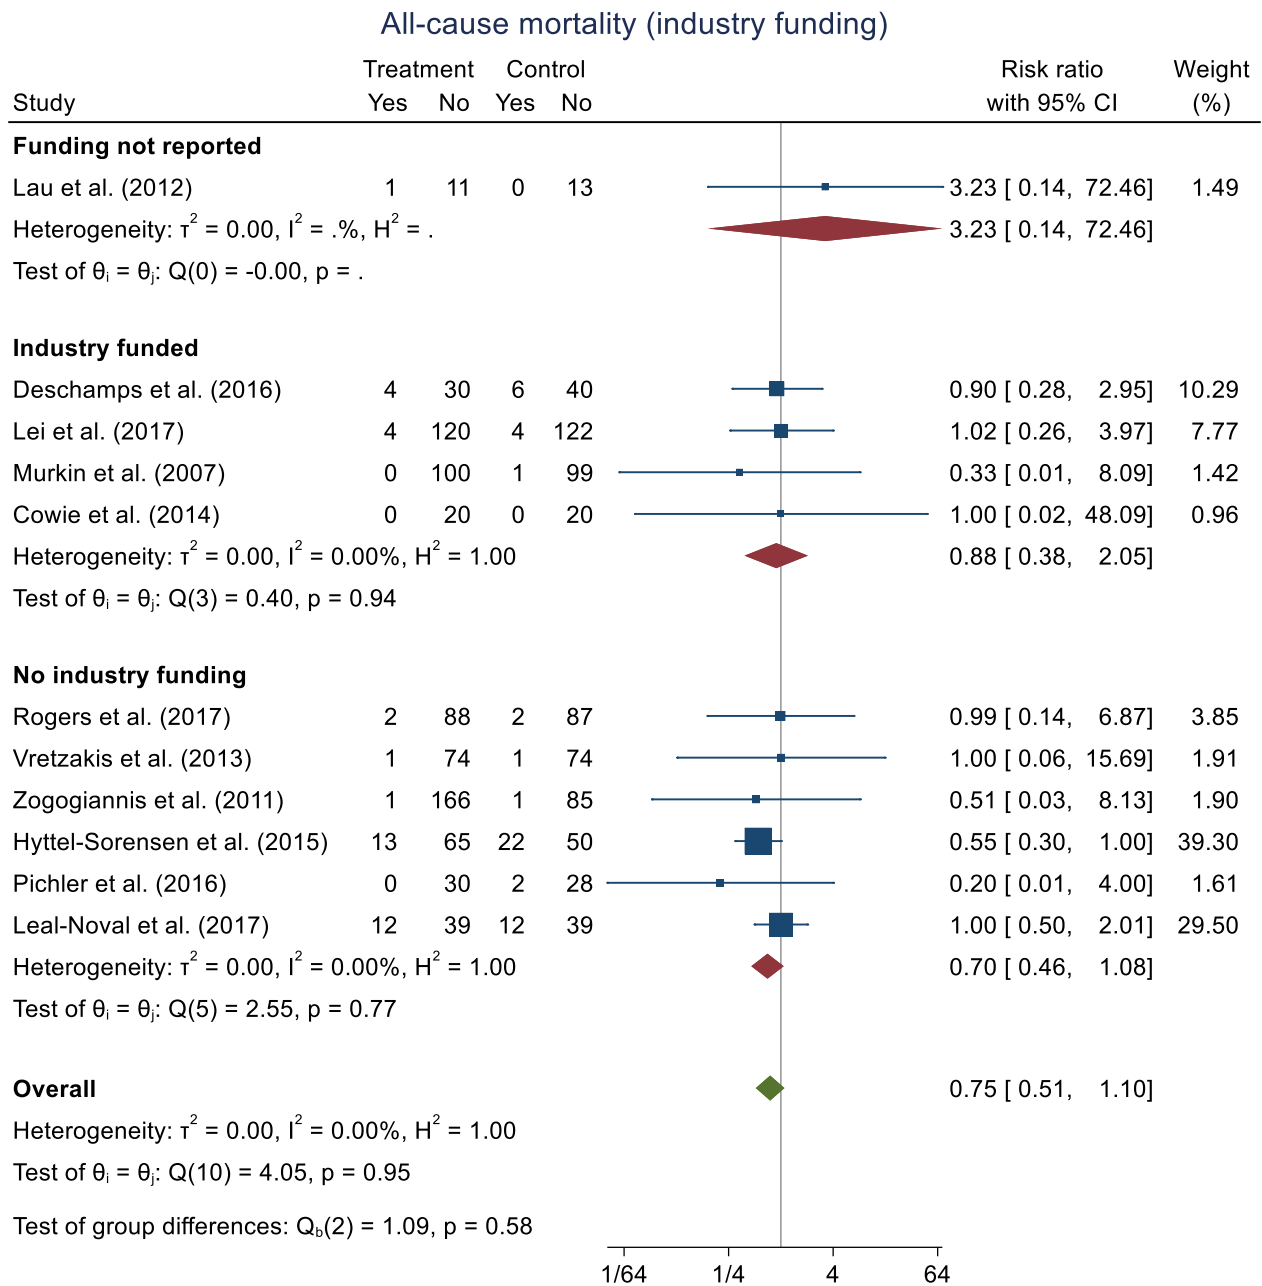

Random-effects DerSimonian–Laird model

## Cerebral NIRS monitoring in the control group (blinded cerebral NIRS monitoring in the control group compared to no cerebral NIRS monitoring in the control group)

Figure S5

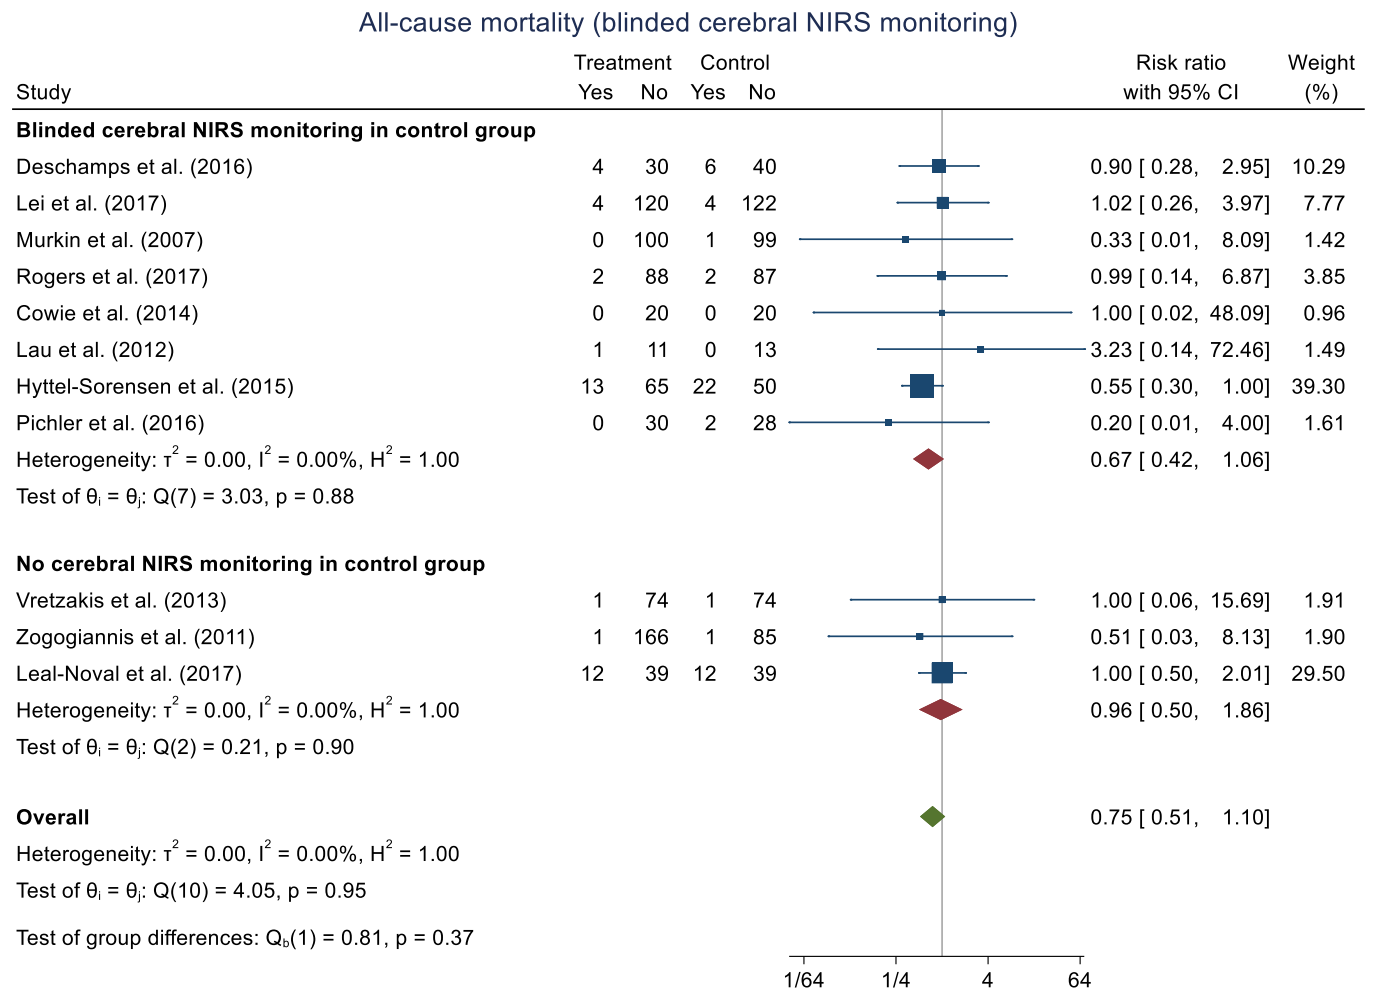

Random-effects DerSimonian–Laird model

## Trial Sequential Analysis

Figure S6 – TSA all-cause mortality

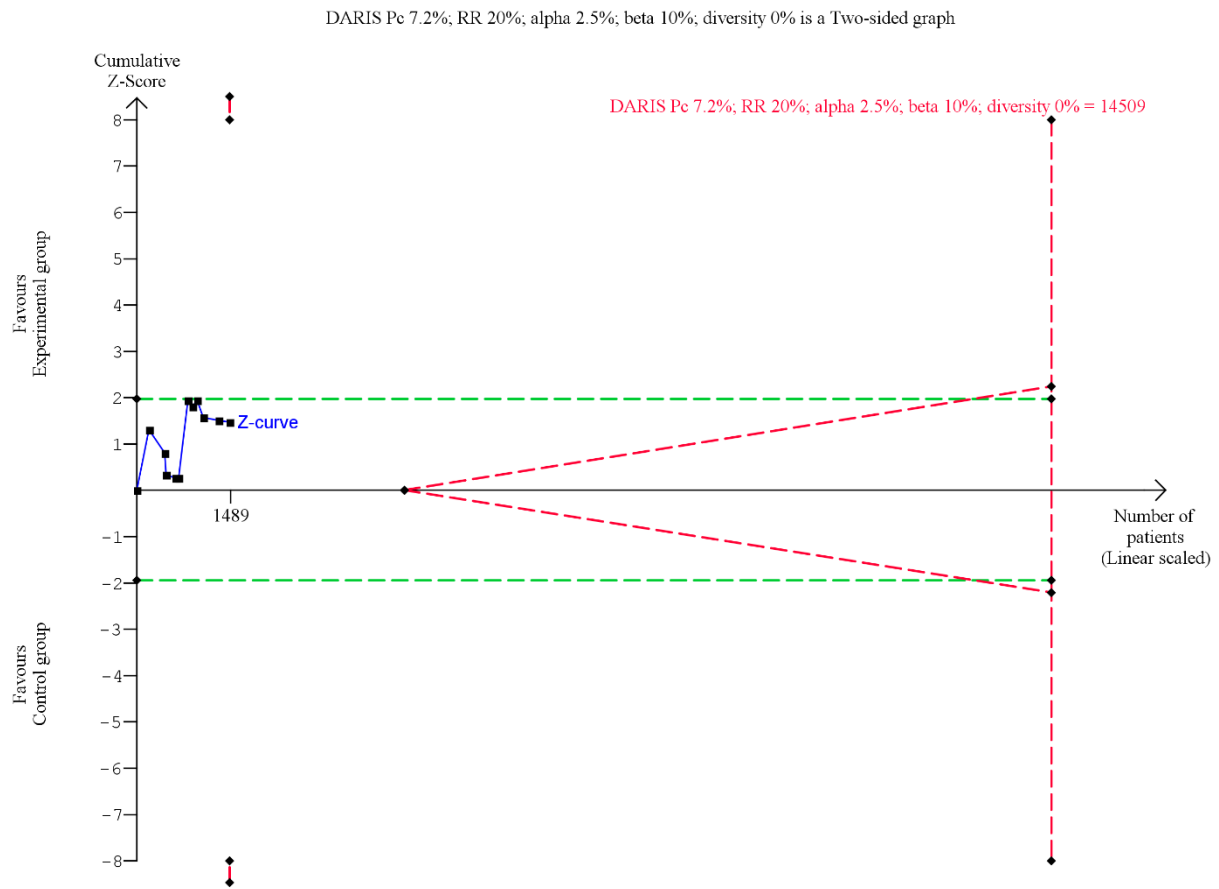

Trial Sequential analysis adjusted CI: 0.16 to 3.62 ( $p=0.1457$ ), diversity = 0%

### Bayes factor

$\text{LnRR meta-analysis} = -0.29$

$\text{LnSE meta-analysis} = 0.20$

$\text{LnRR a priori} = -0.22$

Bayes factor = 0.37

## Sensitivity analyses

### Best-worst case analysis

Assuming a beneficial event in the experimental group and harmful in the control group

Figure S7

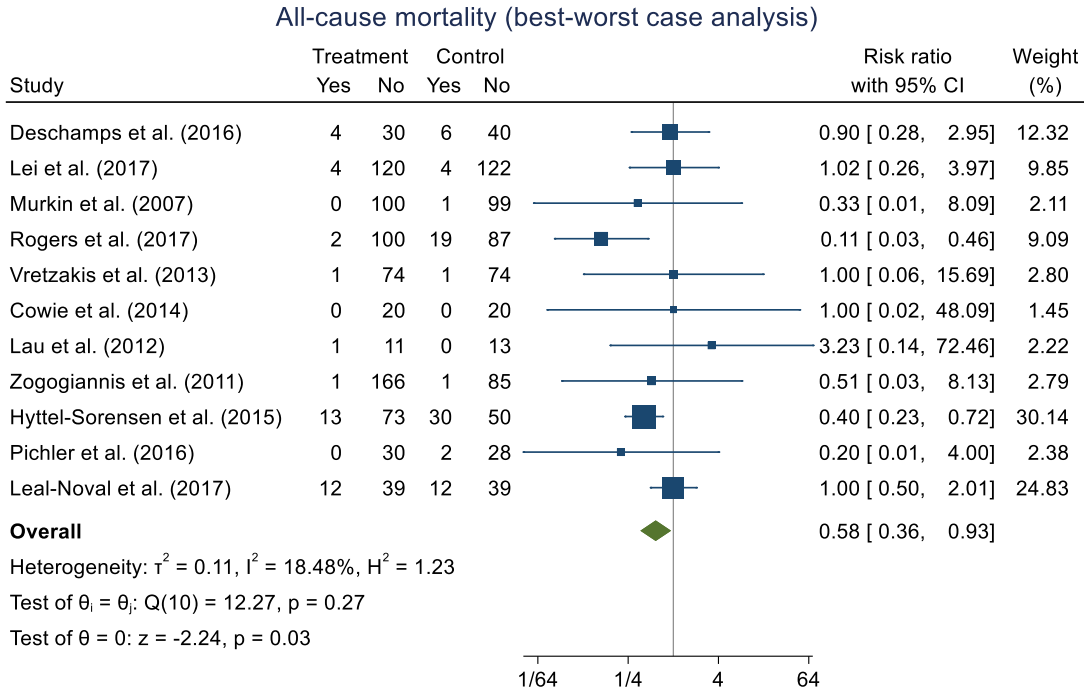

Random-effects DerSimonian–Laird model

### Worst-best case analysis

Assuming a harmful event in the experimental group and beneficial in the control group

Figure S8

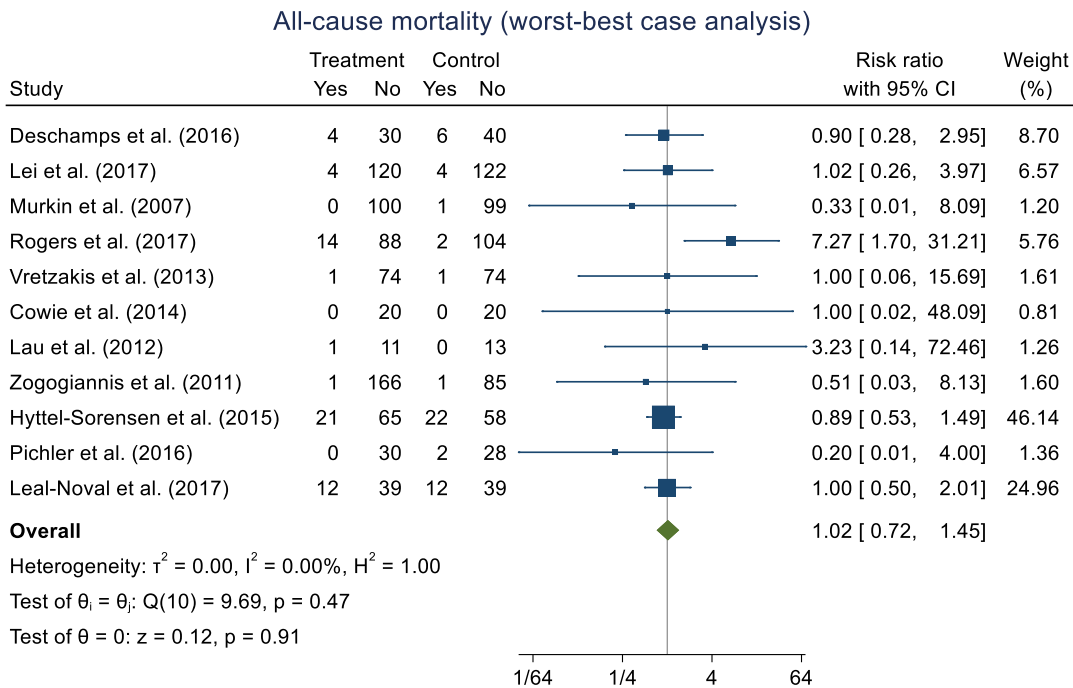

Random-effects DerSimonian–Laird model

## Funnel plot

Figure S9

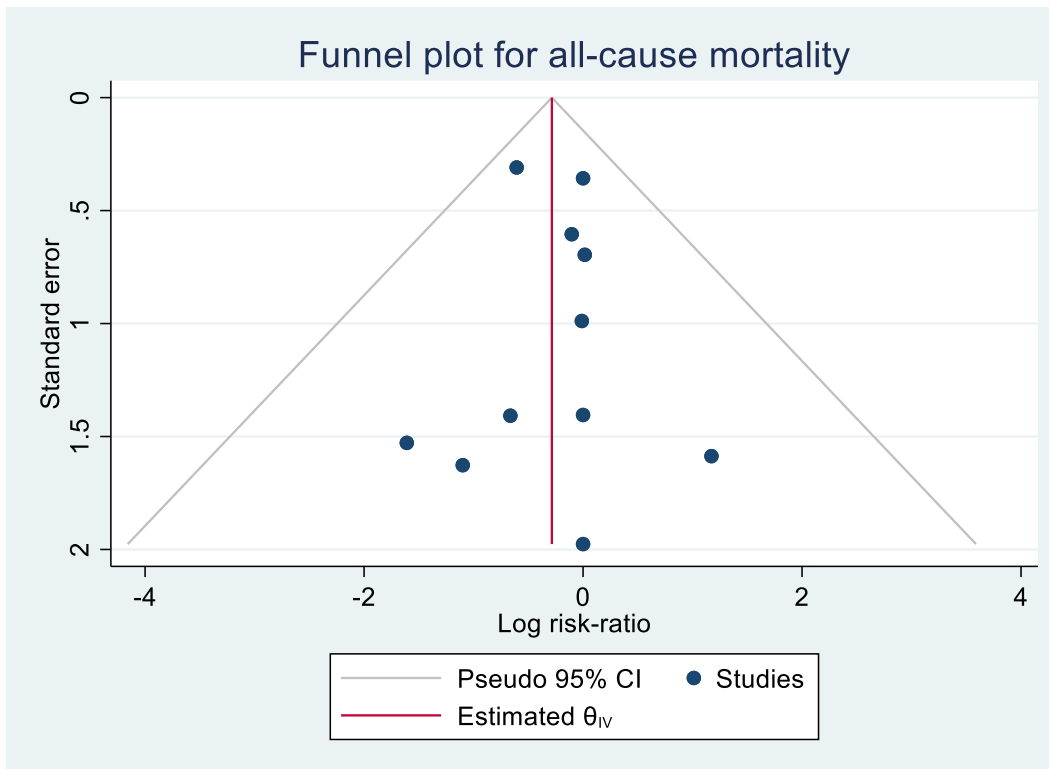

# Moderate or severe, persistent, cognitive or neurological deficit, at maximal follow-up

## Primary analysis

Figure S10 – fixed effect

### Moderate or severe, persistent, cognitive or neurologic deficit

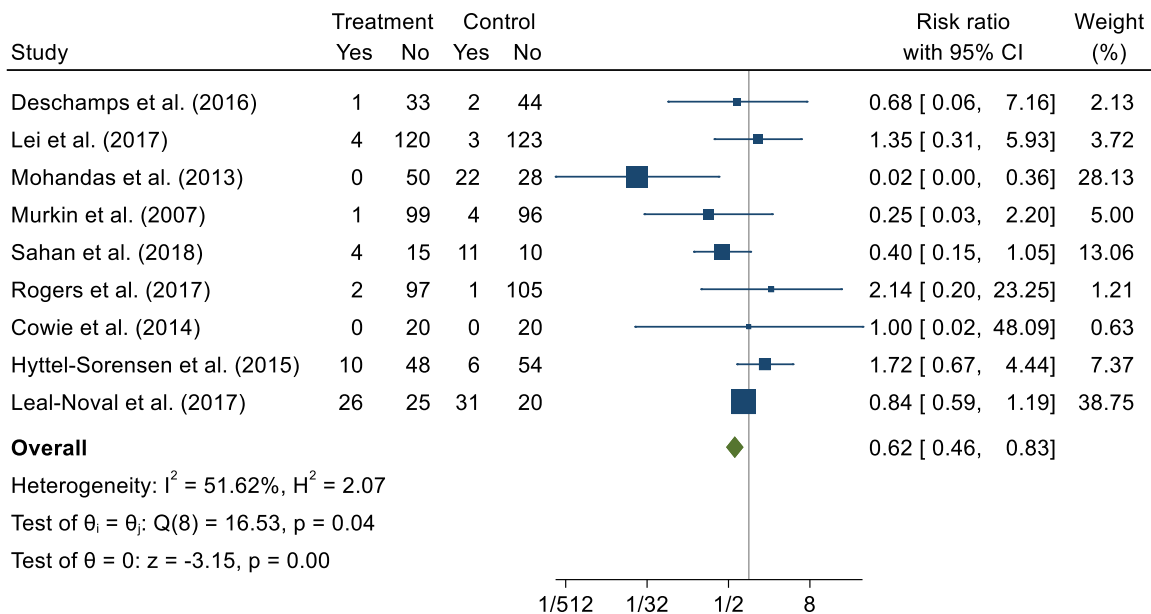

Fixed-effects Mantel–Haenszel model

Figure S11 – random effects

### Moderate or severe, persistent, cognitive or neurologic deficit

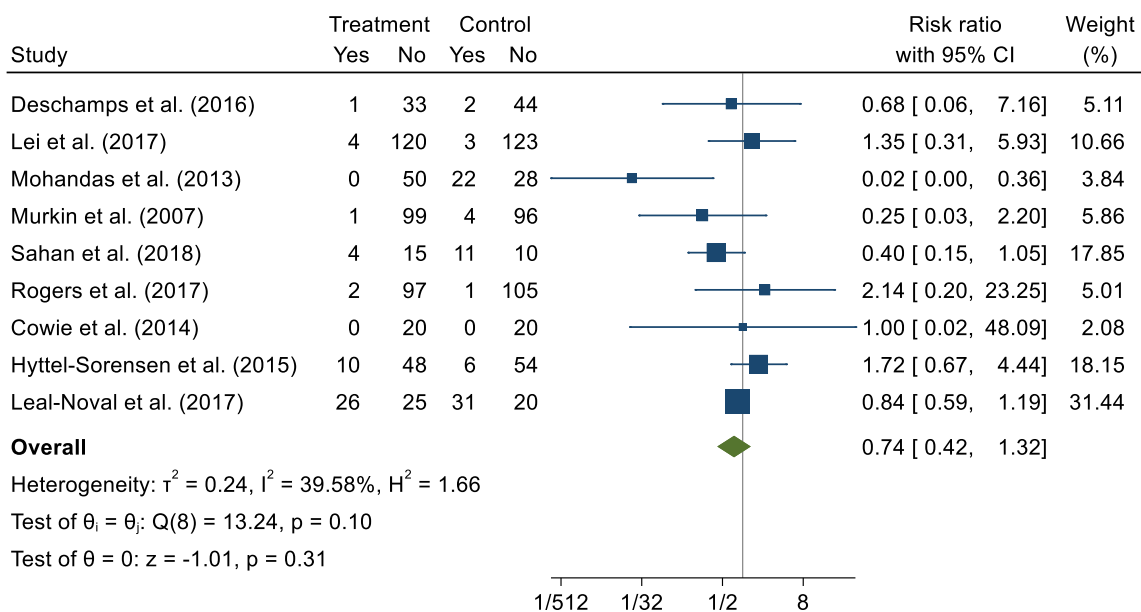

Random-effects DerSimonian–Laird model

## Subgroup analyses

### Risk of bias (high compared to low)

Figure S12

Moderate or severe, persistent, cognitive or neurological deficit (risk of bias)

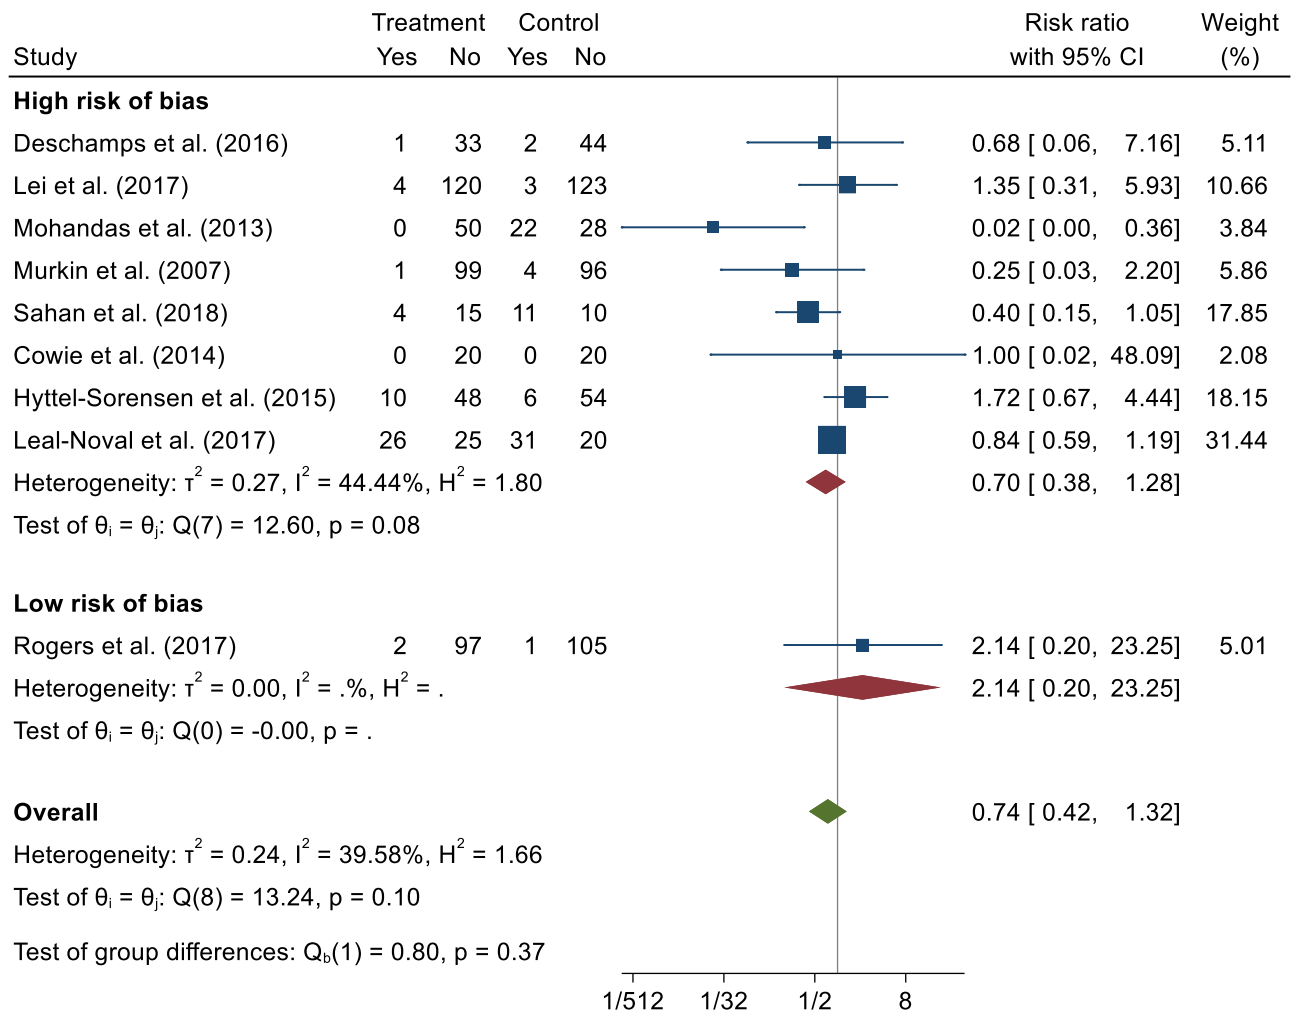

Random-effects DerSimonian–Laird model



## Clinical setting (cardiac surgery compared to neonatal intensive care compared to neurocritical care compared to non-cardiac surgery)

Figure S13

Moderate or severe, persistent, cognitive or neurological deficit (clinical settings)

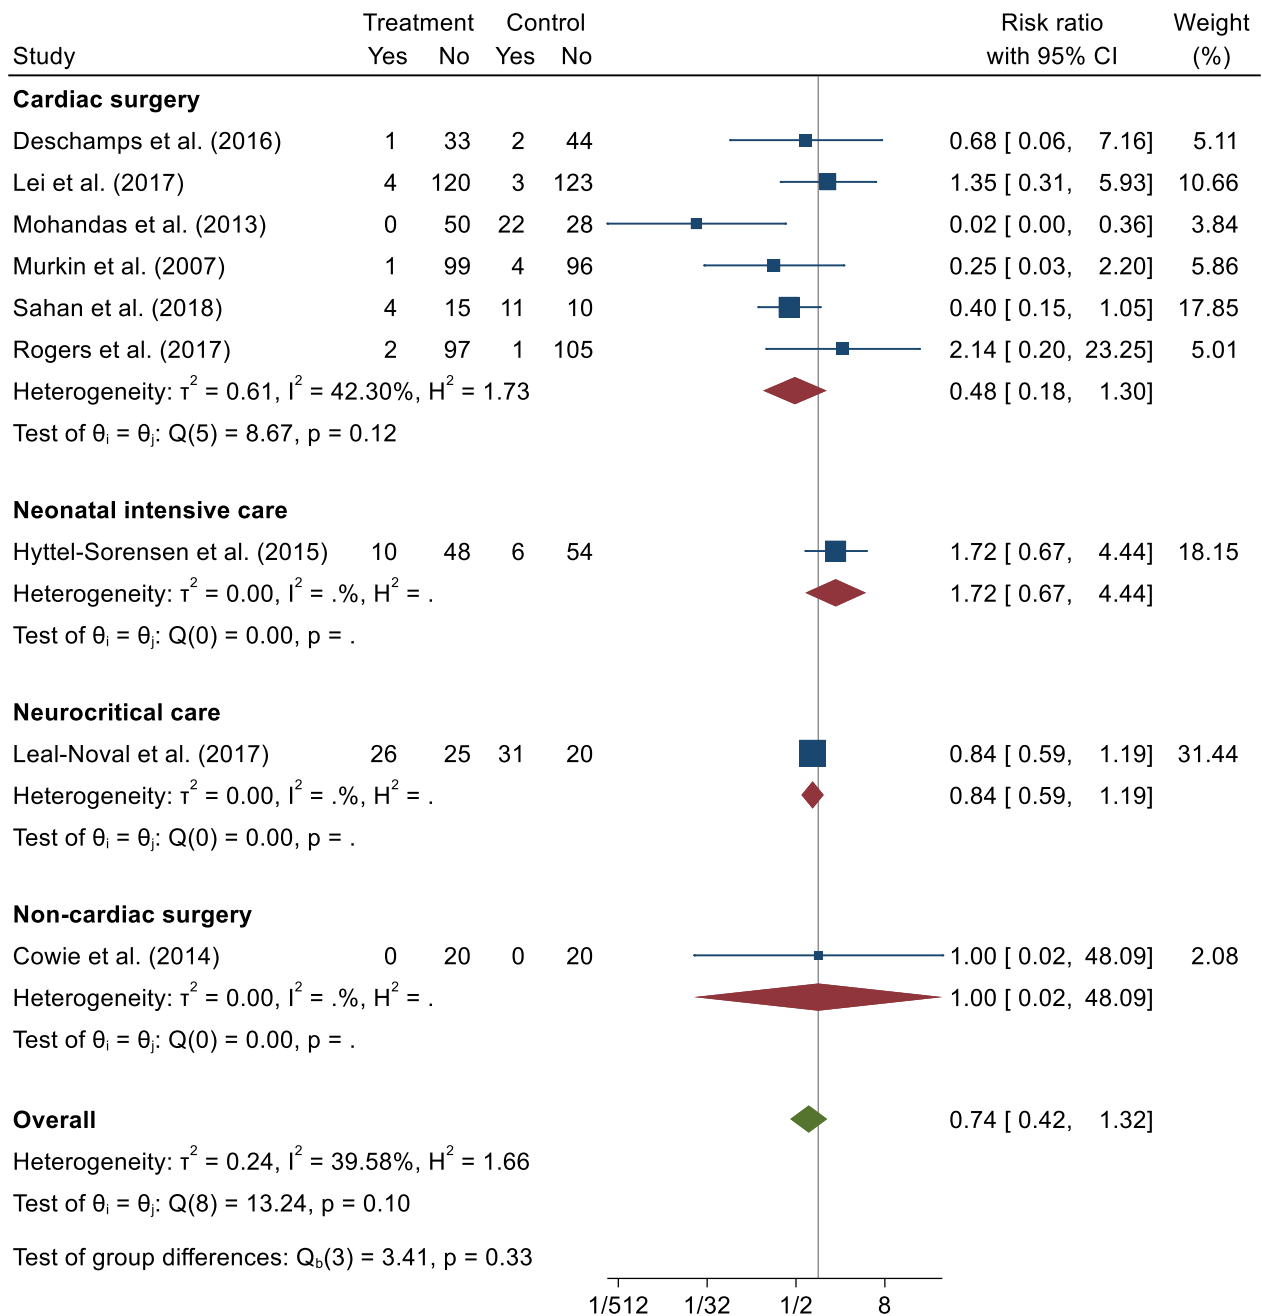

Random-effects DerSimonian–Laird model

## Industry funding (funding not reported compared to industry funded compared to no industry funding)

Figure S14

Moderate or severe, persistent, cognitive or neurological deficit (industry funding)

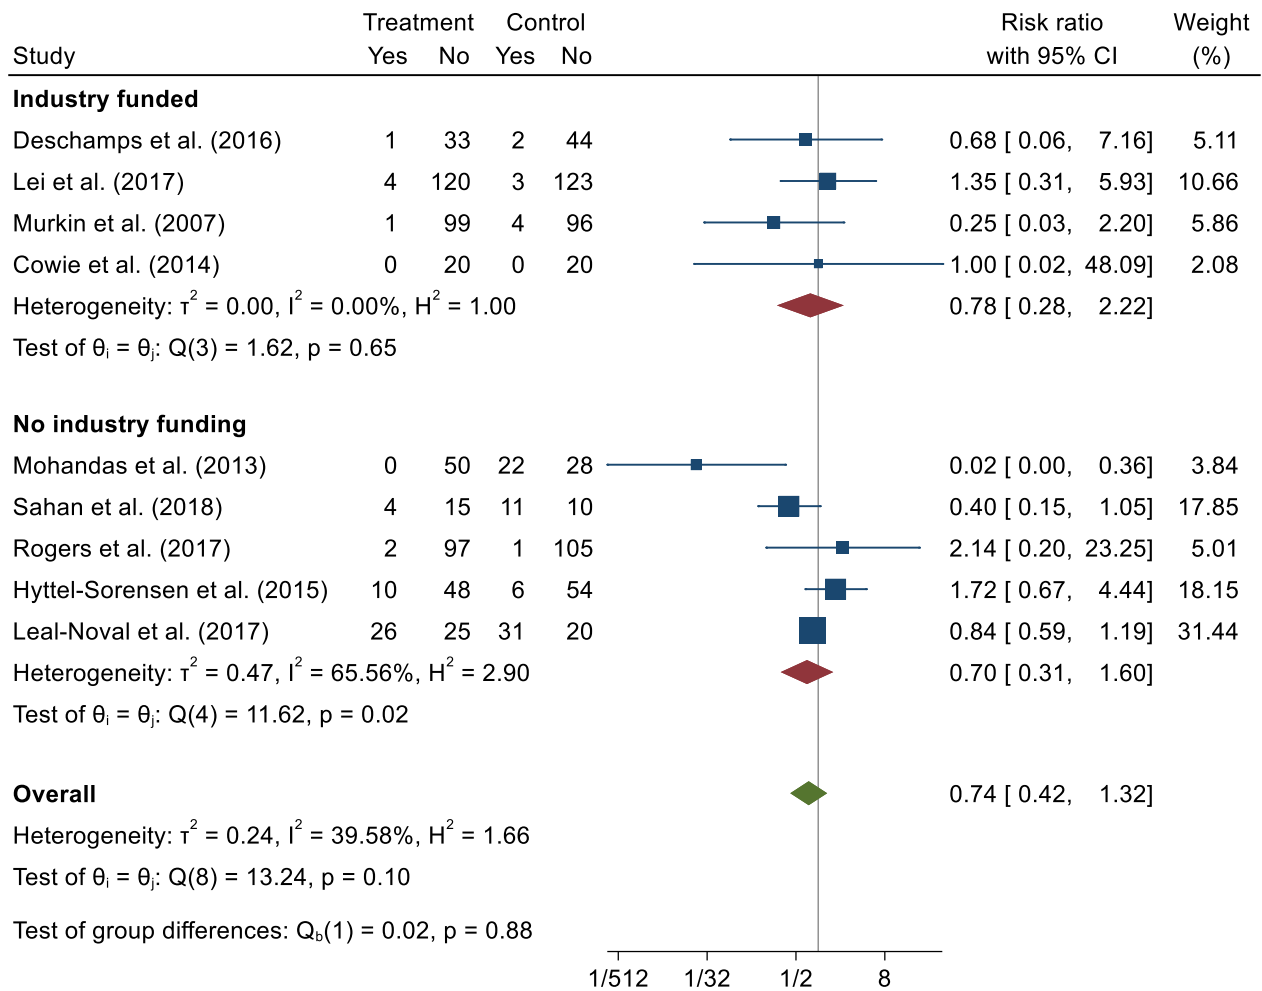

Random-effects DerSimonian–Laird model

## Cerebral NIRS monitoring in the control group (blinded cerebral NIRS monitoring in the control group compared to no cerebral NIRS monitoring in the control group)

Figure S15

Moderate or severe, persistent, cognitive or neurological deficit (blinded cerebral NIRS monitoring)

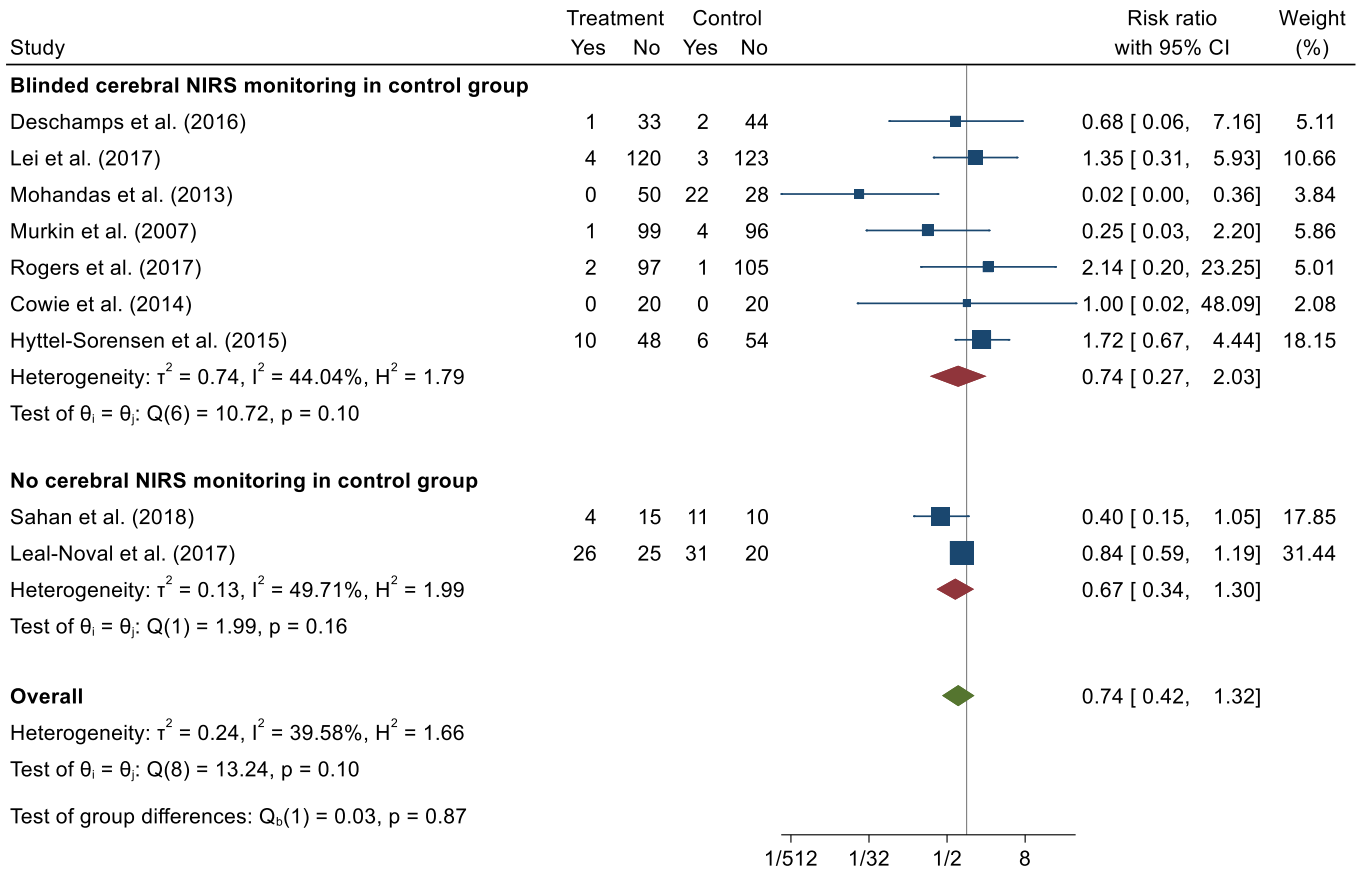

Random-effects DerSimonian–Laird model

## Trial Sequential Analysis

**Figure S16 – TSA moderate or severe, persistent, cognitive or neurologic deficit**

Boundary DARIS Pc 13.8; RR 20%; alpha 2.5%; beta 10%; diversity 78.9 is ignored due to too little information size (3.4% out of 33679).

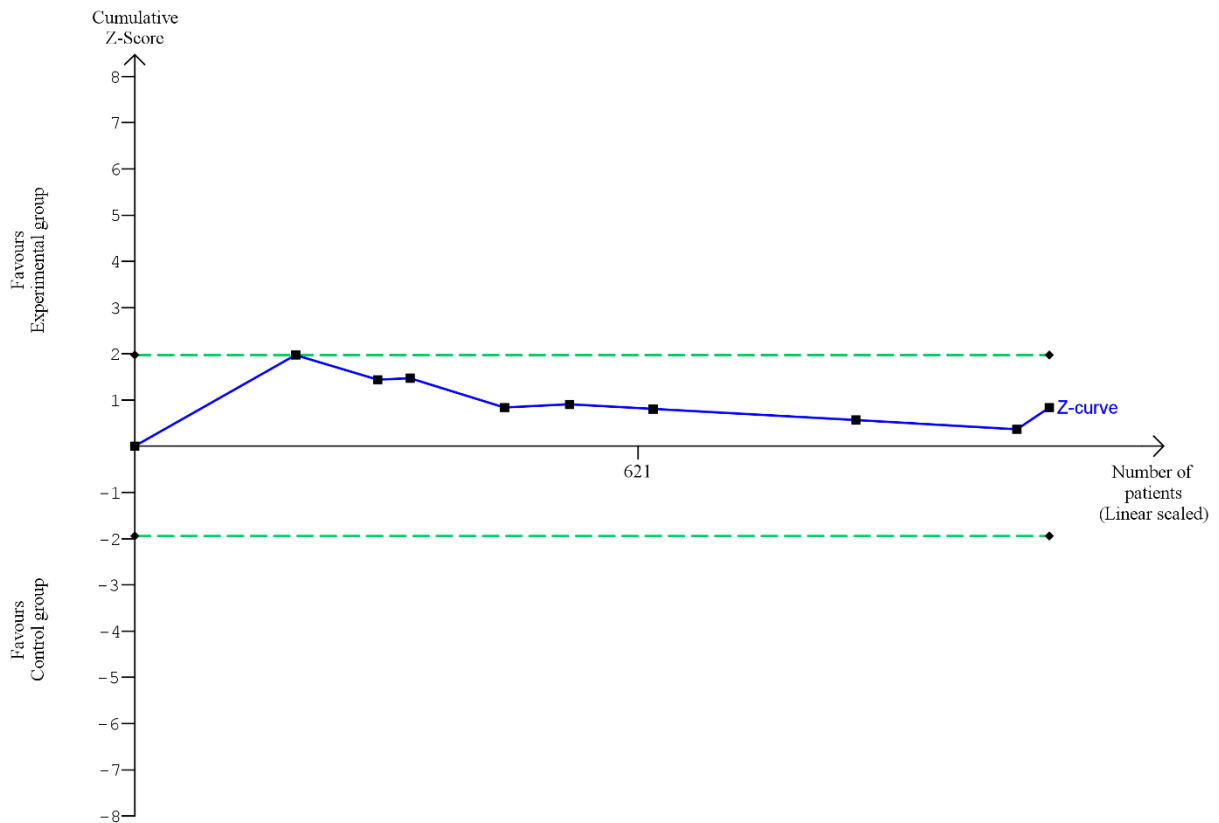

## Bayes factor

LnRR meta-analysis = -0,30

LnSE meta-analysis = 0.29

LnRR a priori = -0.22

Bayes factor = 0.60

## Sensitivity analyses

### Best-worst case analysis

Assuming a beneficial event in the experimental group and harmful in the control group

Figure S17

Moderate or severe, persistent, cognitive or neurological deficit (best-worst case analysis)

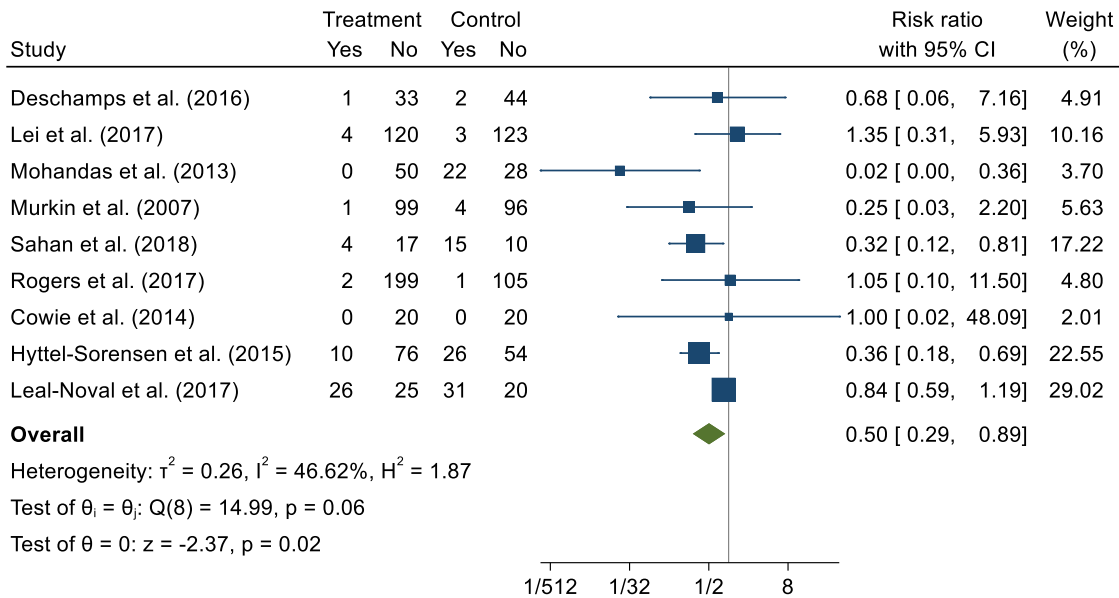

Random-effects DerSimonian–Laird model

### Worst-best case analysis

Assuming a harmful event in the experimental group and beneficial in the control group

Figure S18

Moderate or severe, persistent, cognitive or neurologic deficit (worst-best case analysis)

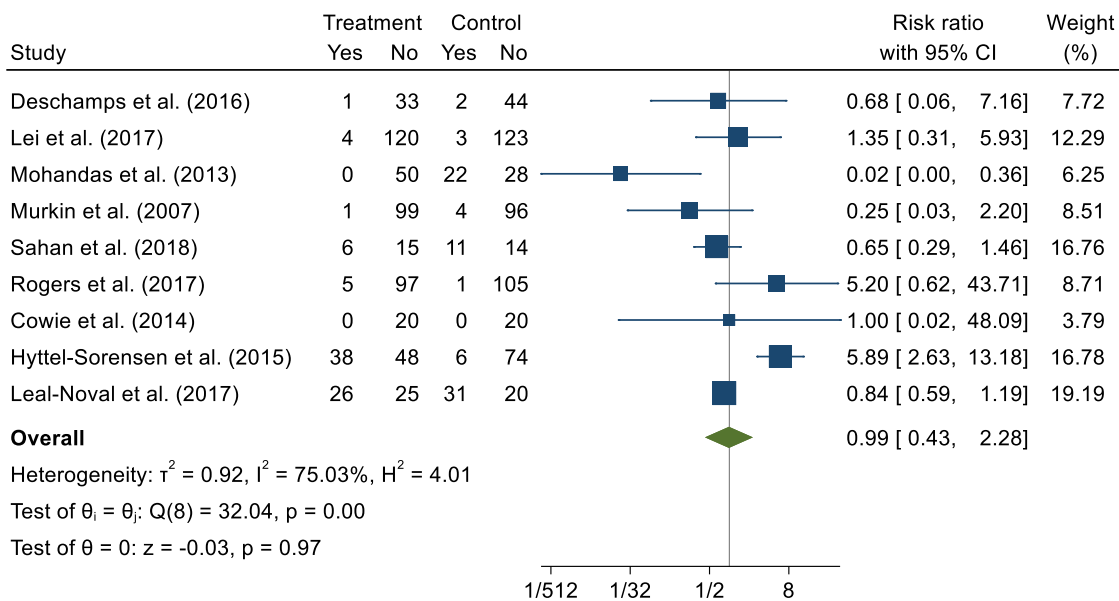

Random-effects DerSimonian–Laird model

**Heterogeneity (excluding Mohandas et al 2013)**  
**Figure S19**

Moderate or severe, persistent, cognitive or neurologic deficit (excluding Mohandas et al 2013)

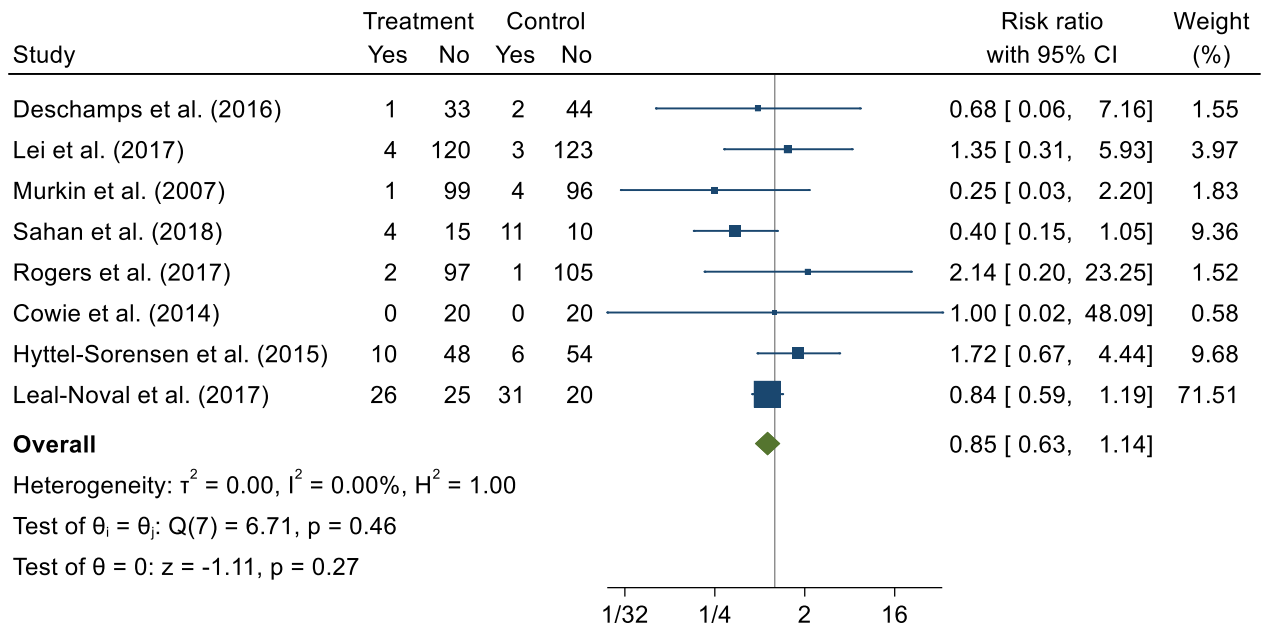

Random-effects DerSimonian–Laird model

# Proportion of participants with one or more serious adverse events

## Primary analysis

### Figure S20 – fixed effect

Proportion of participants with one or more serious adverse events

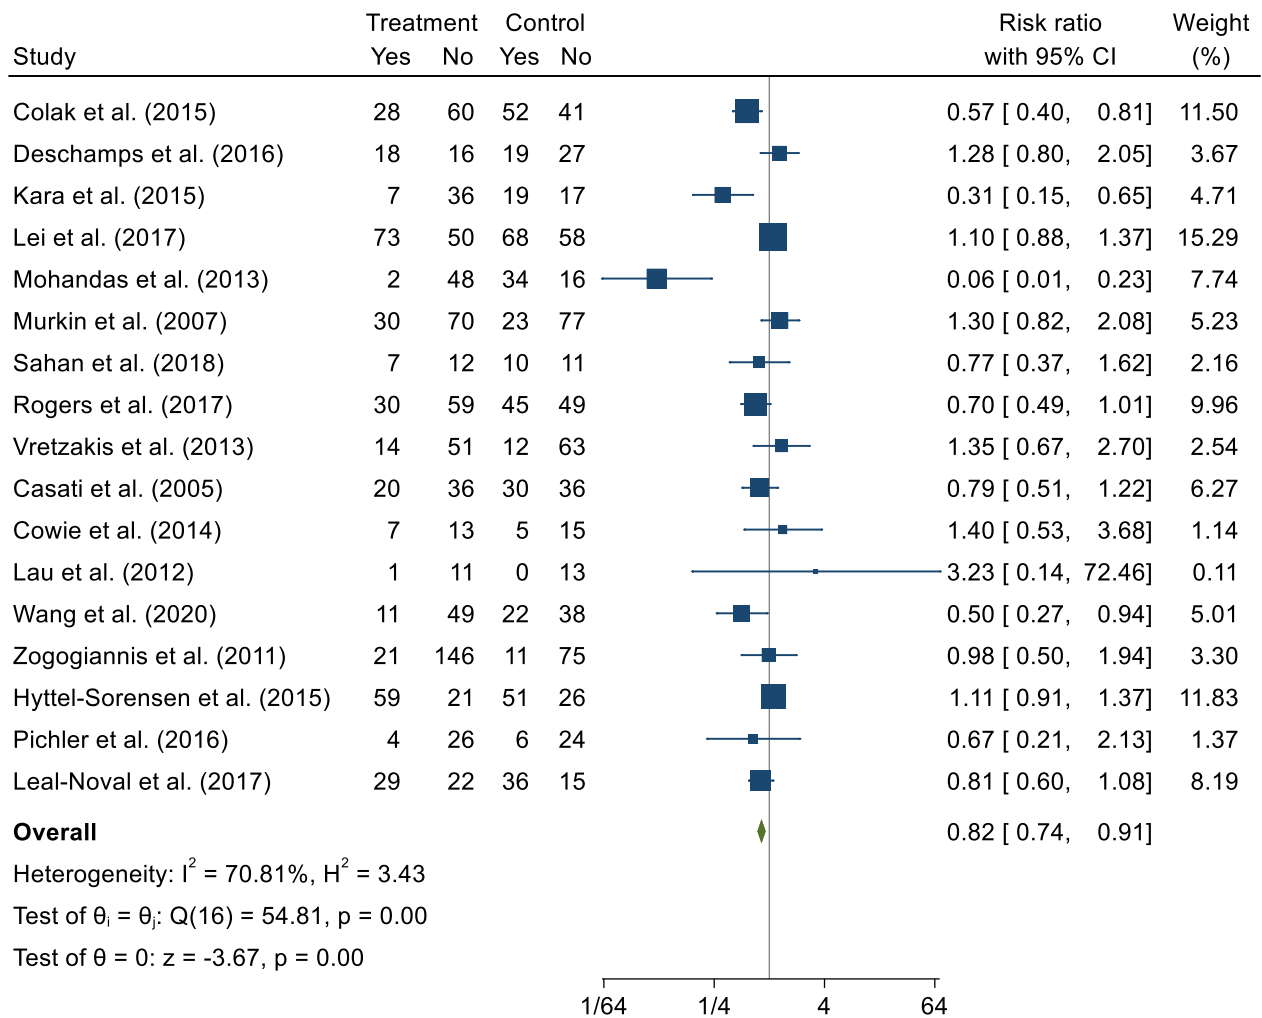

Fixed-effects Mantel–Haenszel model

Figure S21 – random effects

## Proportion of participants with one or more serious adverse events

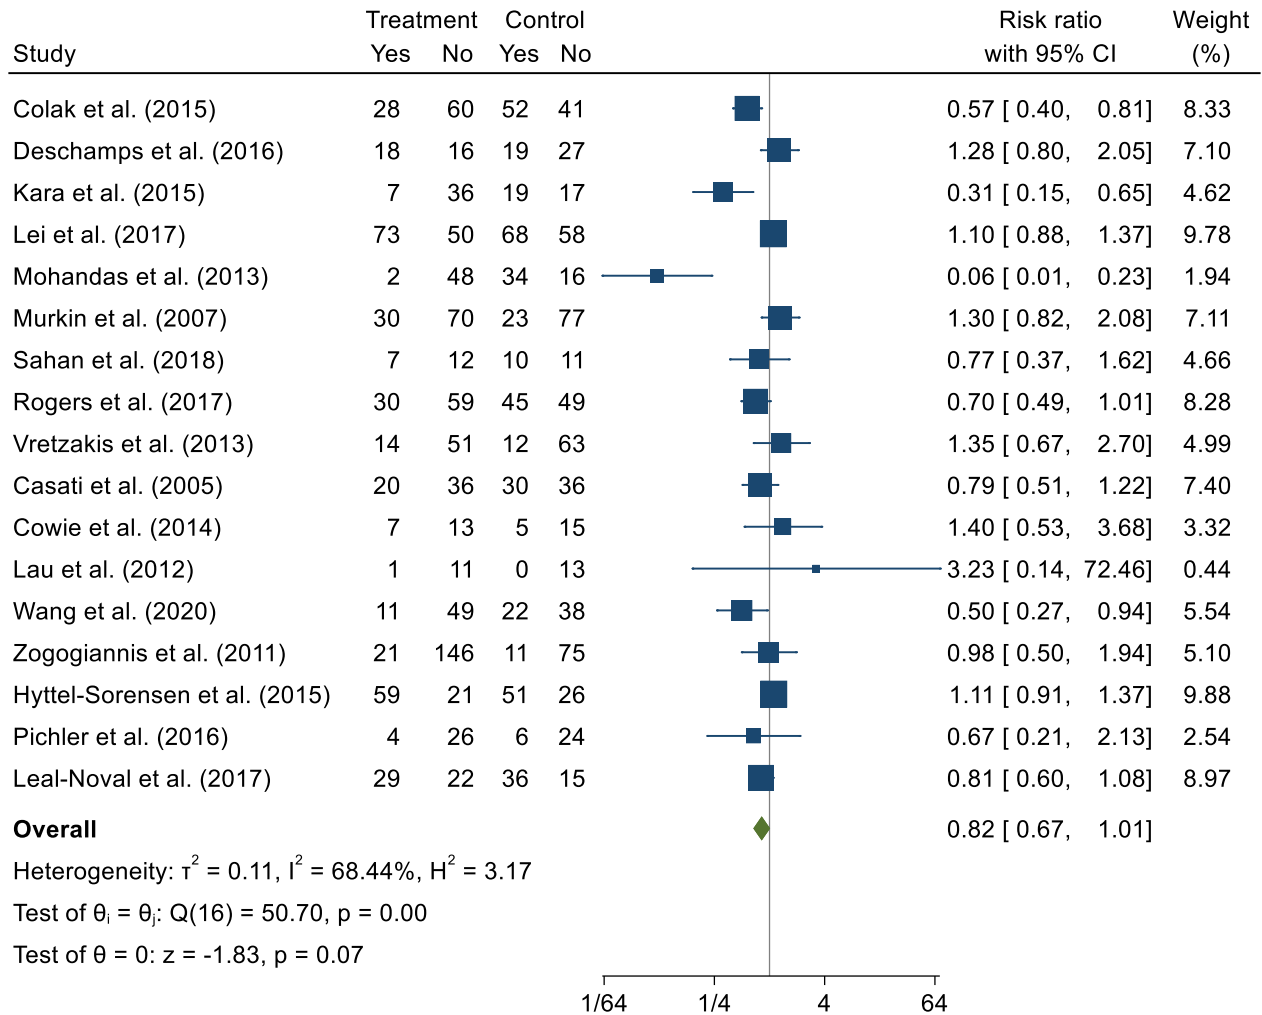

Random-effects DerSimonian–Laird model



## Subgroup analyses

### Risk of bias (high compared to low)

Figure S22

Proportion of participants with one or more serious adverse events (risk of bias)

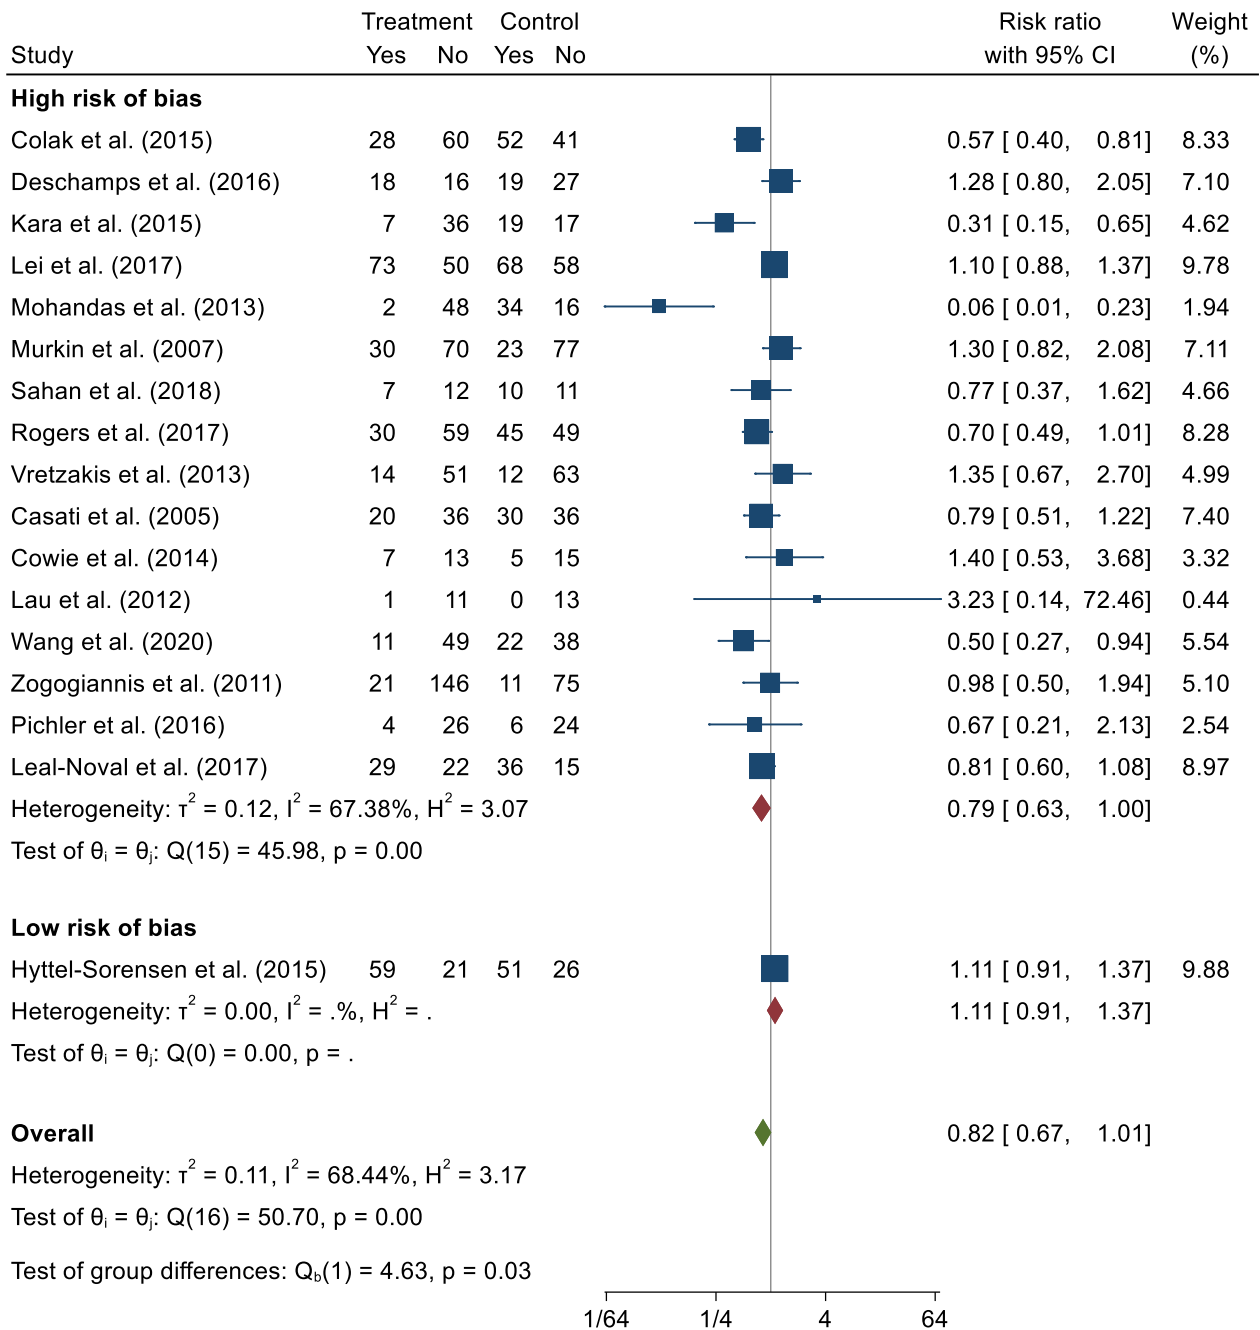

Random-effects DerSimonian–Laird model

## Clinical setting (cardiac surgery compared to neonatal intensive care compared to neurocritical care compared to non-cardiac surgery)

Figure S23

Proportion of participants with one or more serious adverse events (clinical settings)

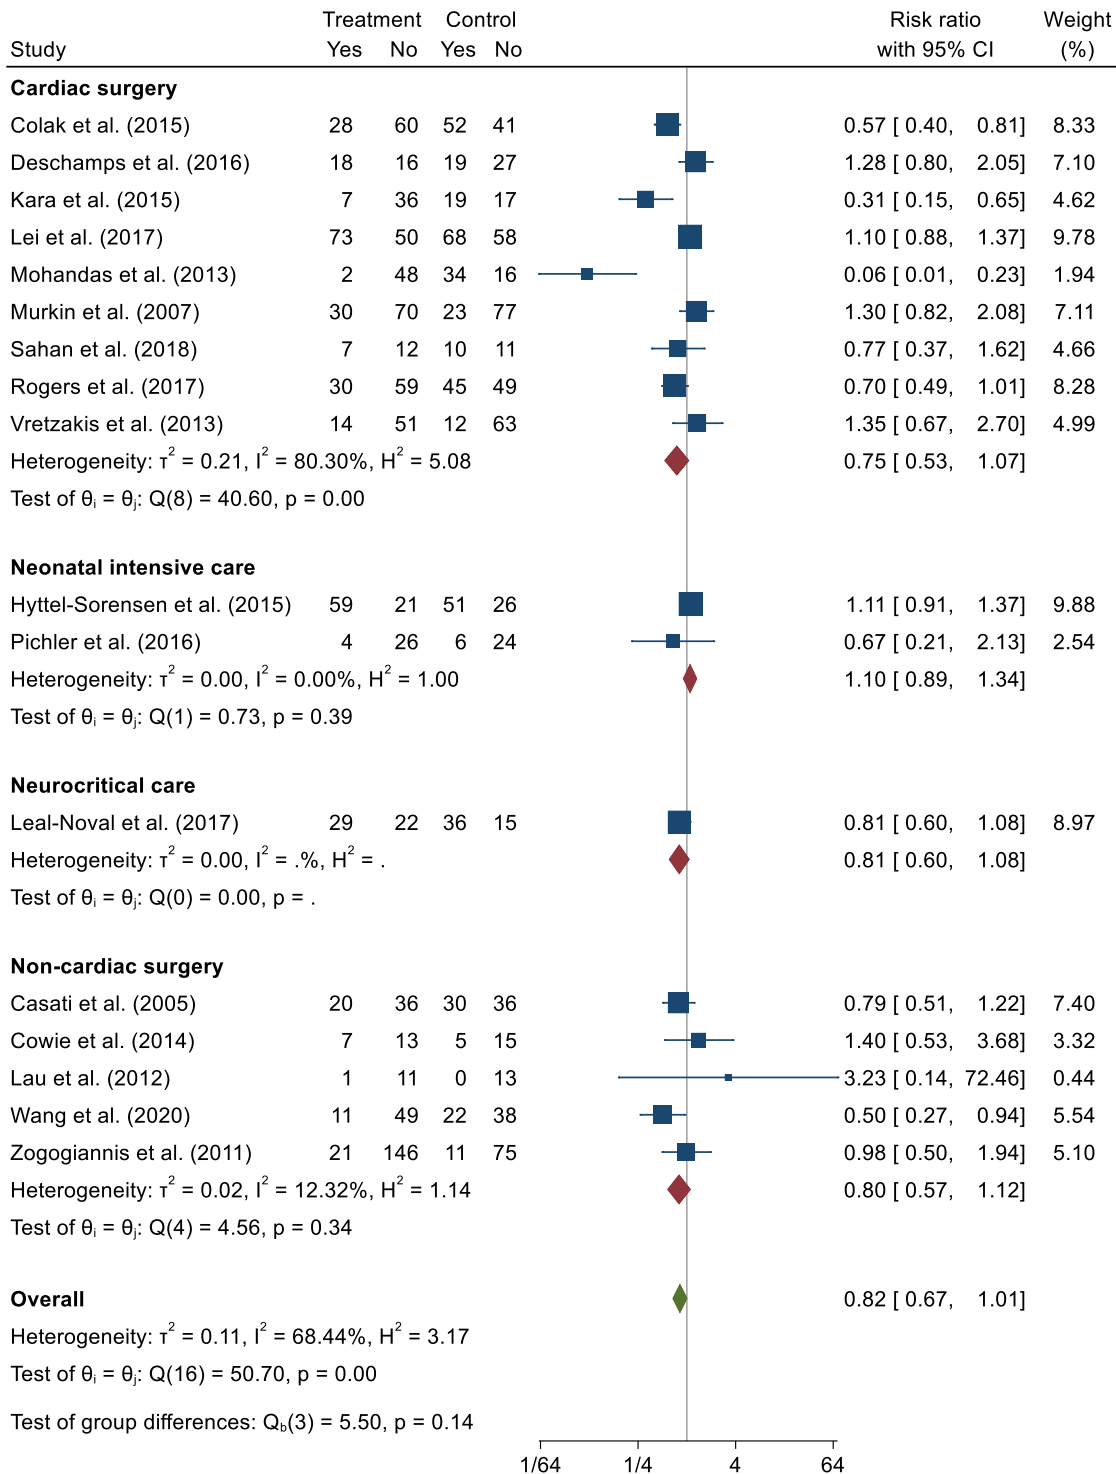

Random-effects DerSimonian–Laird model

## Industry funding (funding not reported compared to industry funded compared to no industry funding)

Figure S24

Proportion of participants with one or more serious adverse events (industry funding)

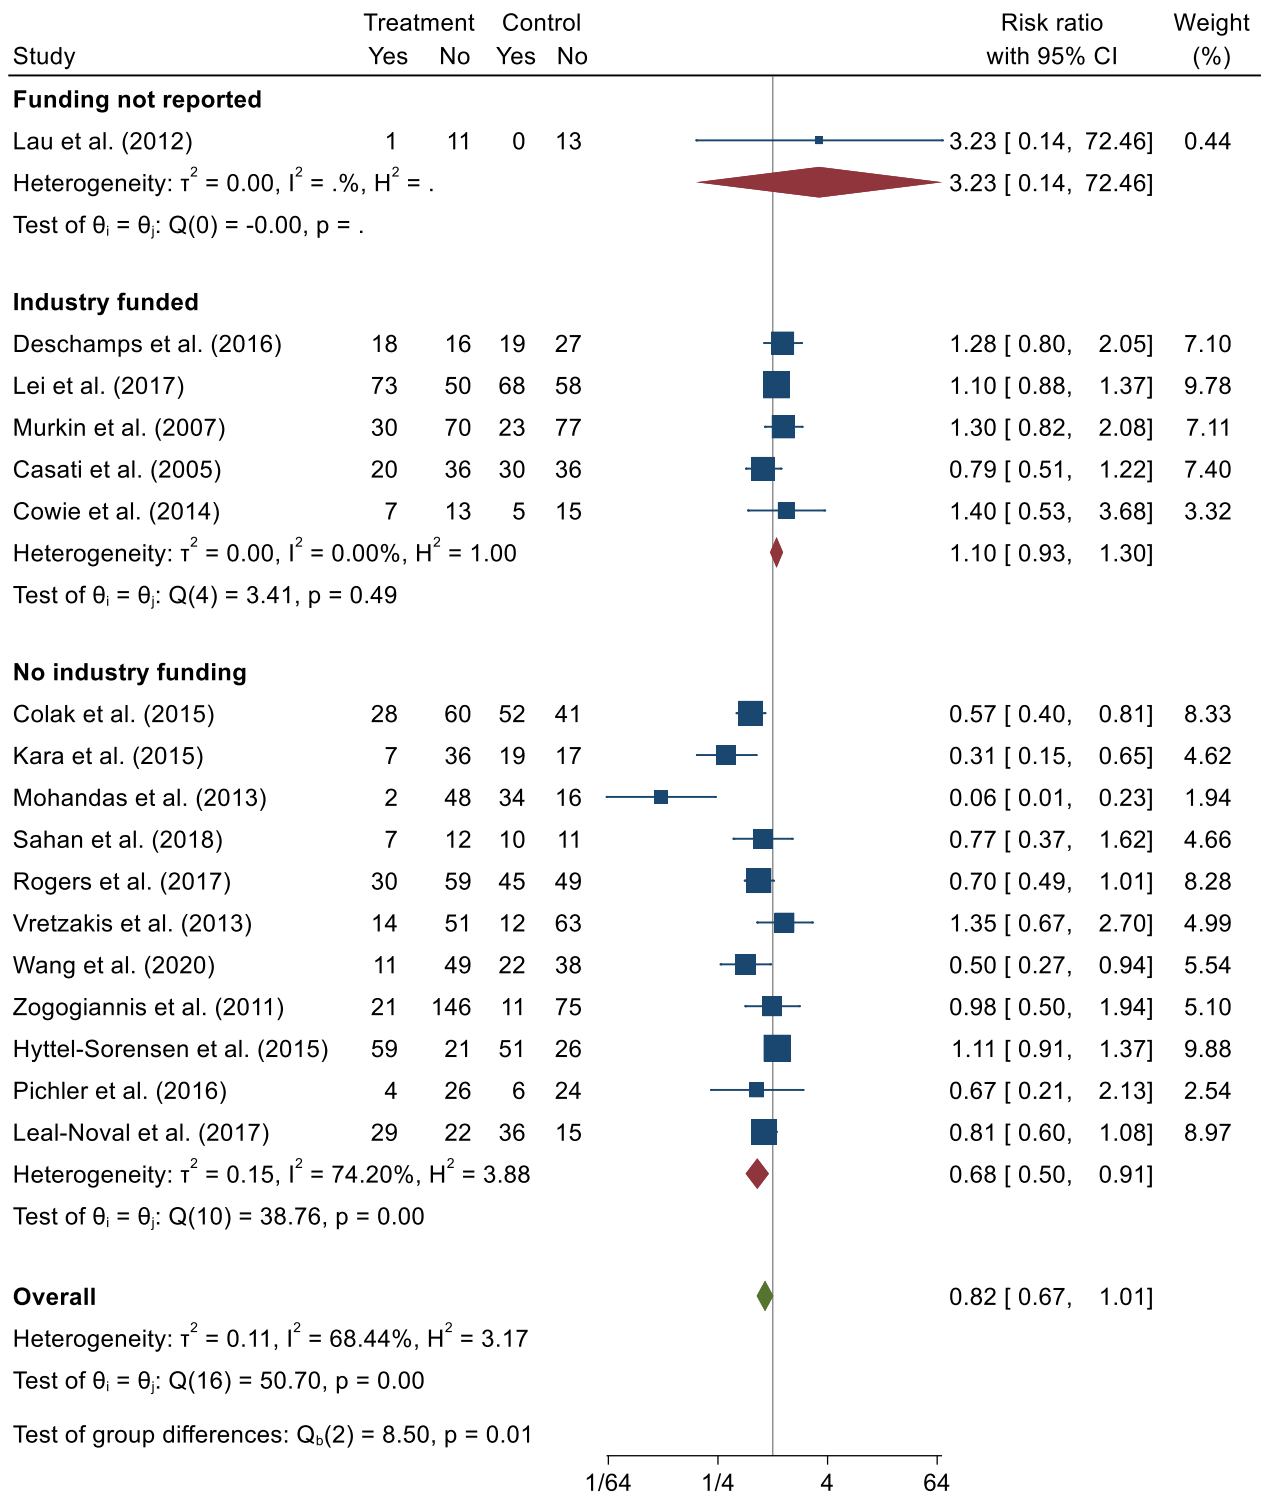

Random-effects DerSimonian–Laird model

## Cerebral NIRS monitoring in the control group (blinded cerebral NIRS monitoring in the control group compared to no cerebral NIRS monitoring in the control group)

Figure S25

Proportion of participants with one or more serious adverse events (blinded cerebral NIRS monitoring)

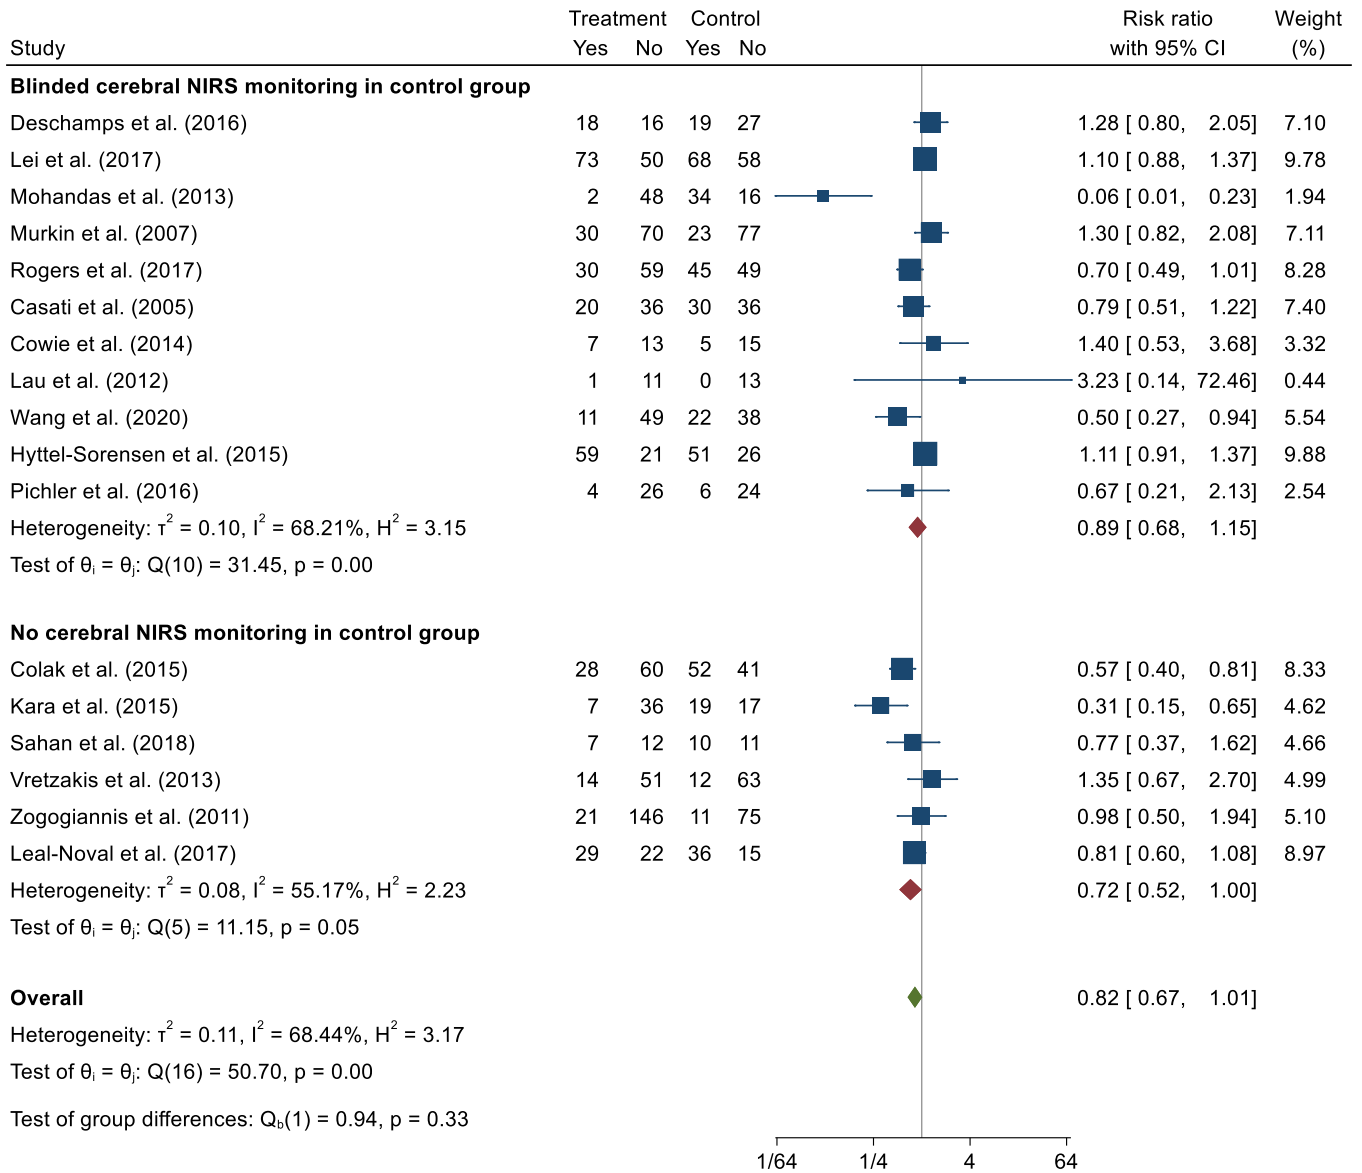

Random-effects DerSimonian–Laird model

### Trial Sequential Analysis

Figure S26 – TSA proportion of participants with one or more serious adverse events

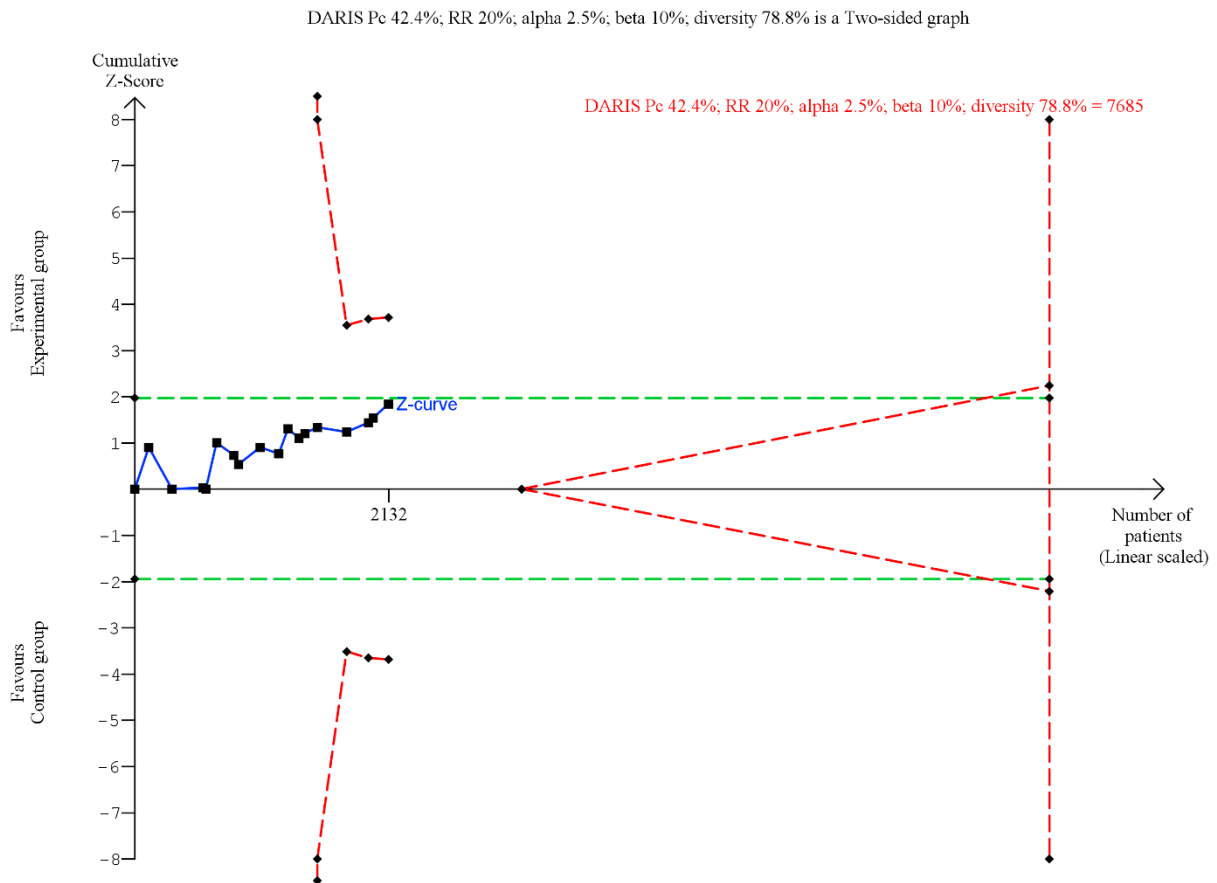

Trial Sequential analysis adjusted CI: 0.56 to 1.20 (p=0.07)

### Bayes factor

LnRR meta-analysis = -0.20

LnSE meta-analysis = 0.10

LnRR a priori = -0.22

Bayes factor = 0.14

## Sensitivity analyses

### Best-worst case analysis

Assuming a beneficial event in the experimental group and harmful in the control group

Figure S27

Proportion of participants with one or more serious adverse events (best-worst case analysis)

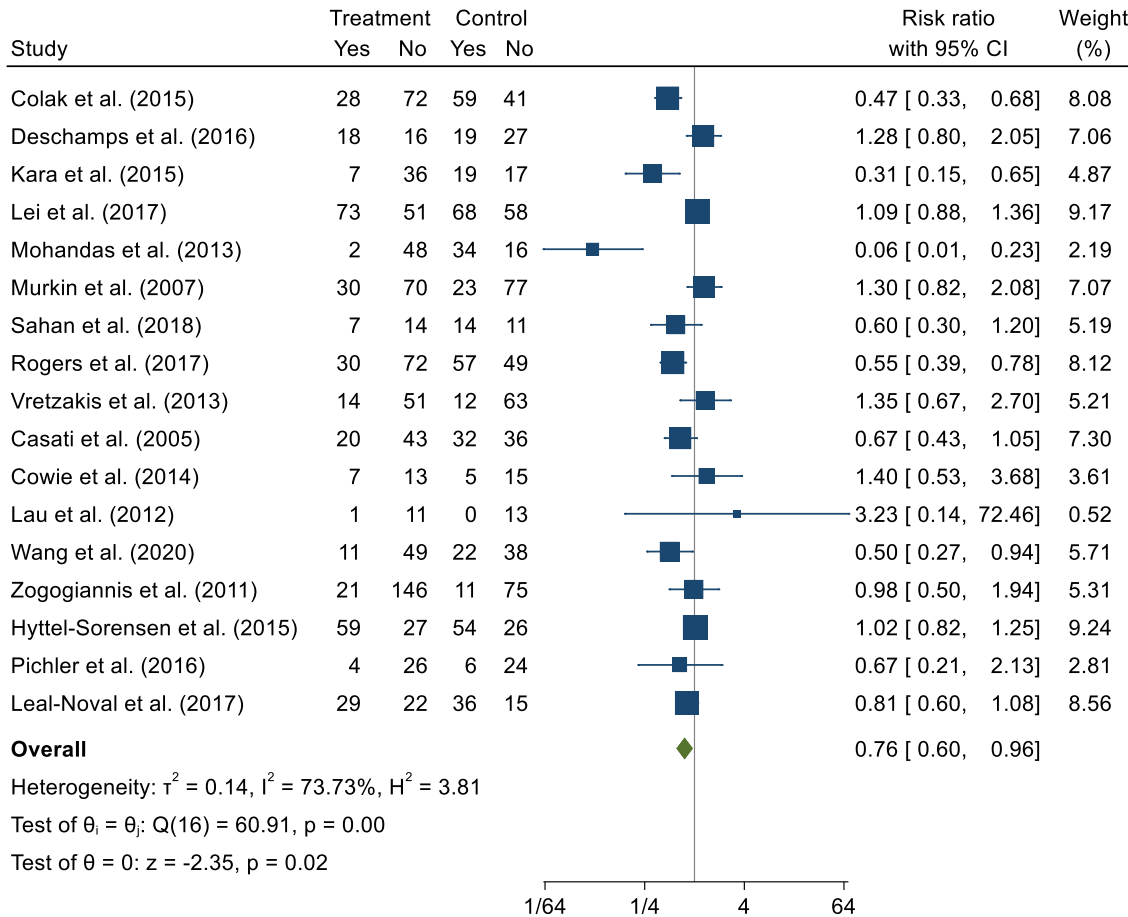

Random-effects DerSimonian–Laird model

## Worst-best case analysis

Assuming a harmful event in the experimental group and beneficial in the control group

Figure S28

Proportion of participants with one or more serious adverse events (worst-best case analysis)

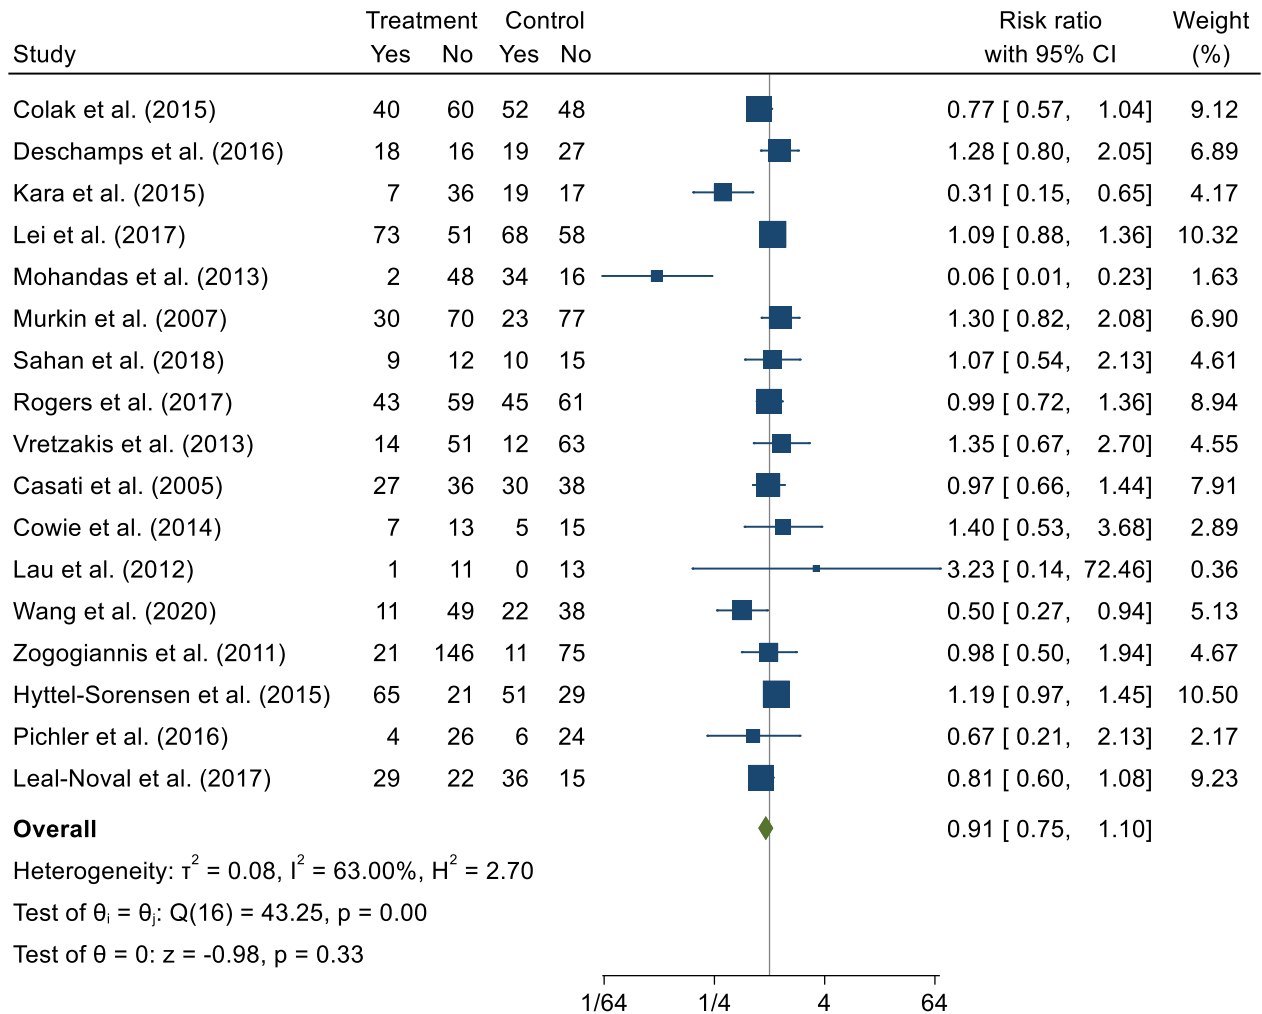

Random-effects DerSimonian–Laird model

## Heterogeneity (excluding Mohandas et al. 2013)

Figure S29

Proportion of participants with one or more serious adverse events (excluding Mohandas et al 2013)

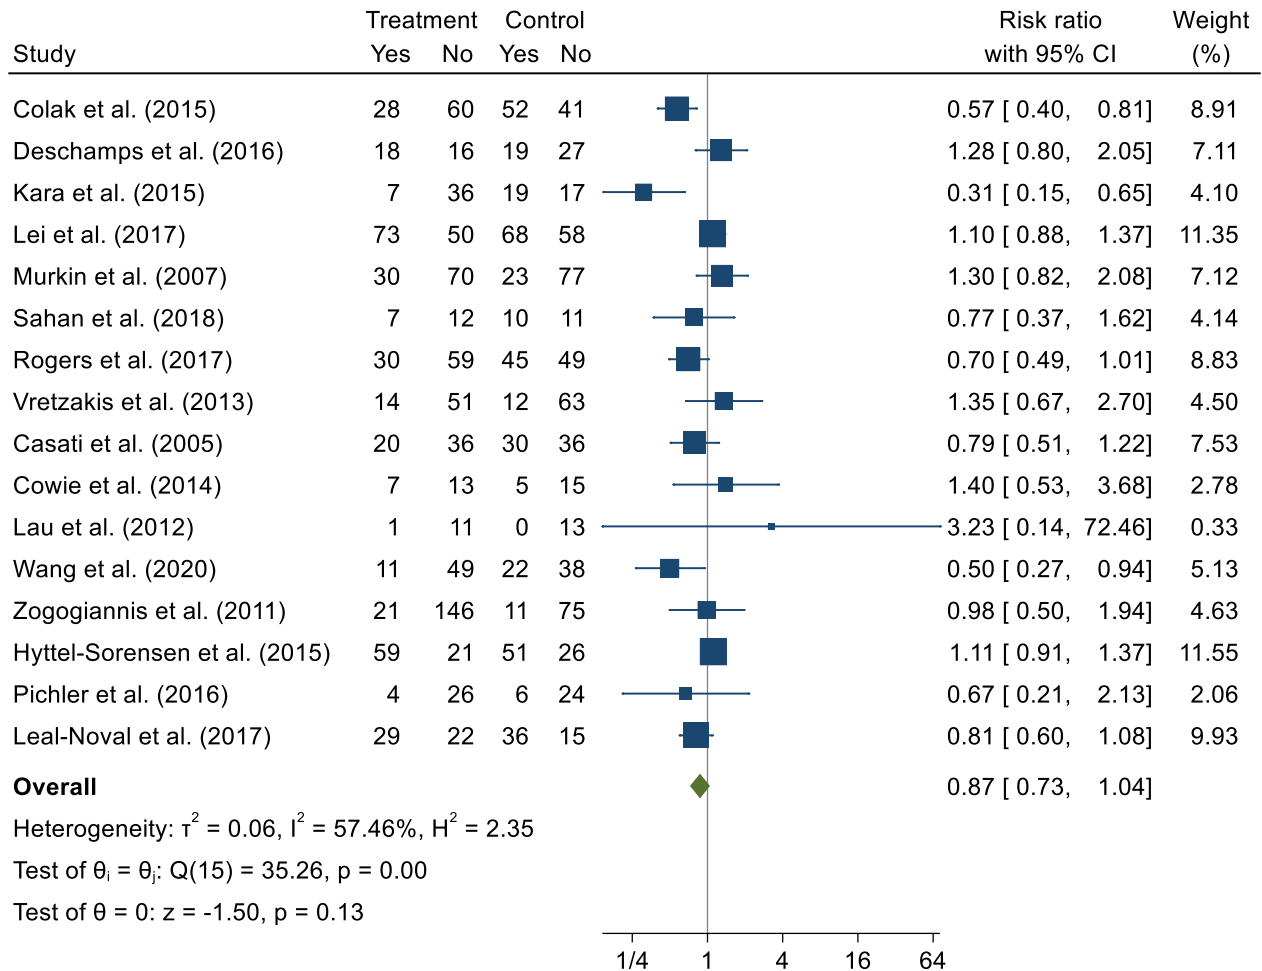

Random-effects DerSimonian–Laird model



## Funnel plot

Figure S30

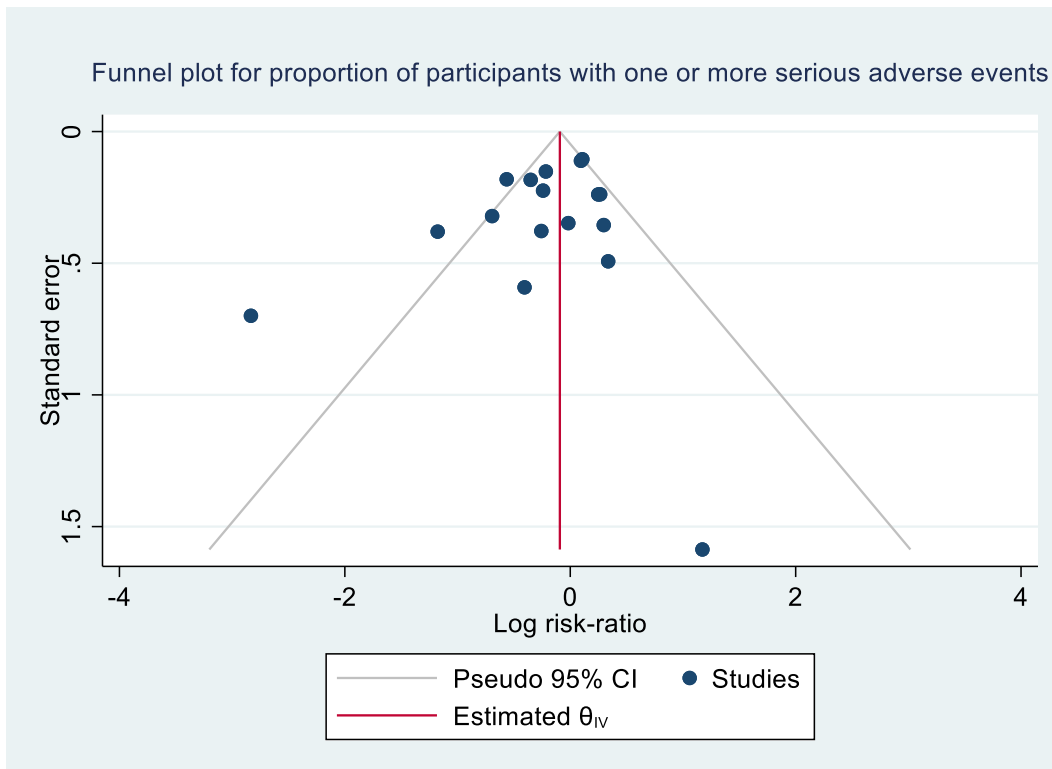

Harbord test:  $p=0.60$

# Mild, moderate or severe, temporary or persistent, cognitive or neurological deficit

## Primary analysis

Figure S31 – fixed effect

Mild, moderate or severe, temporary or persistent, cognitive or neurologic deficit

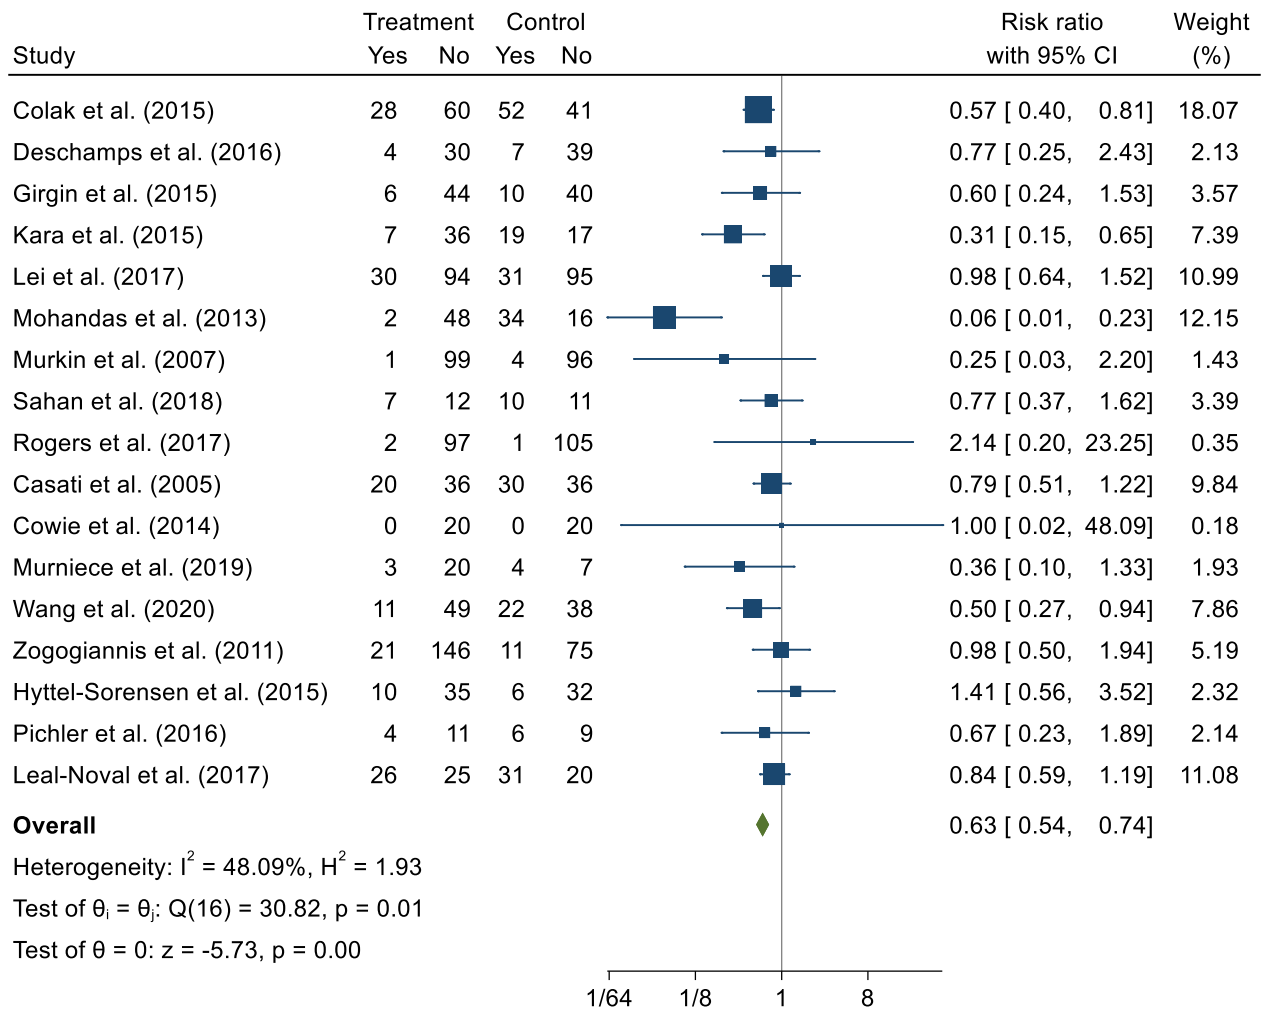

Fixed-effects Mantel–Haenszel model

Figure S32 – random effects

## Mild, moderate or severe, temporary or persistent, cognitive or neurologic deficit

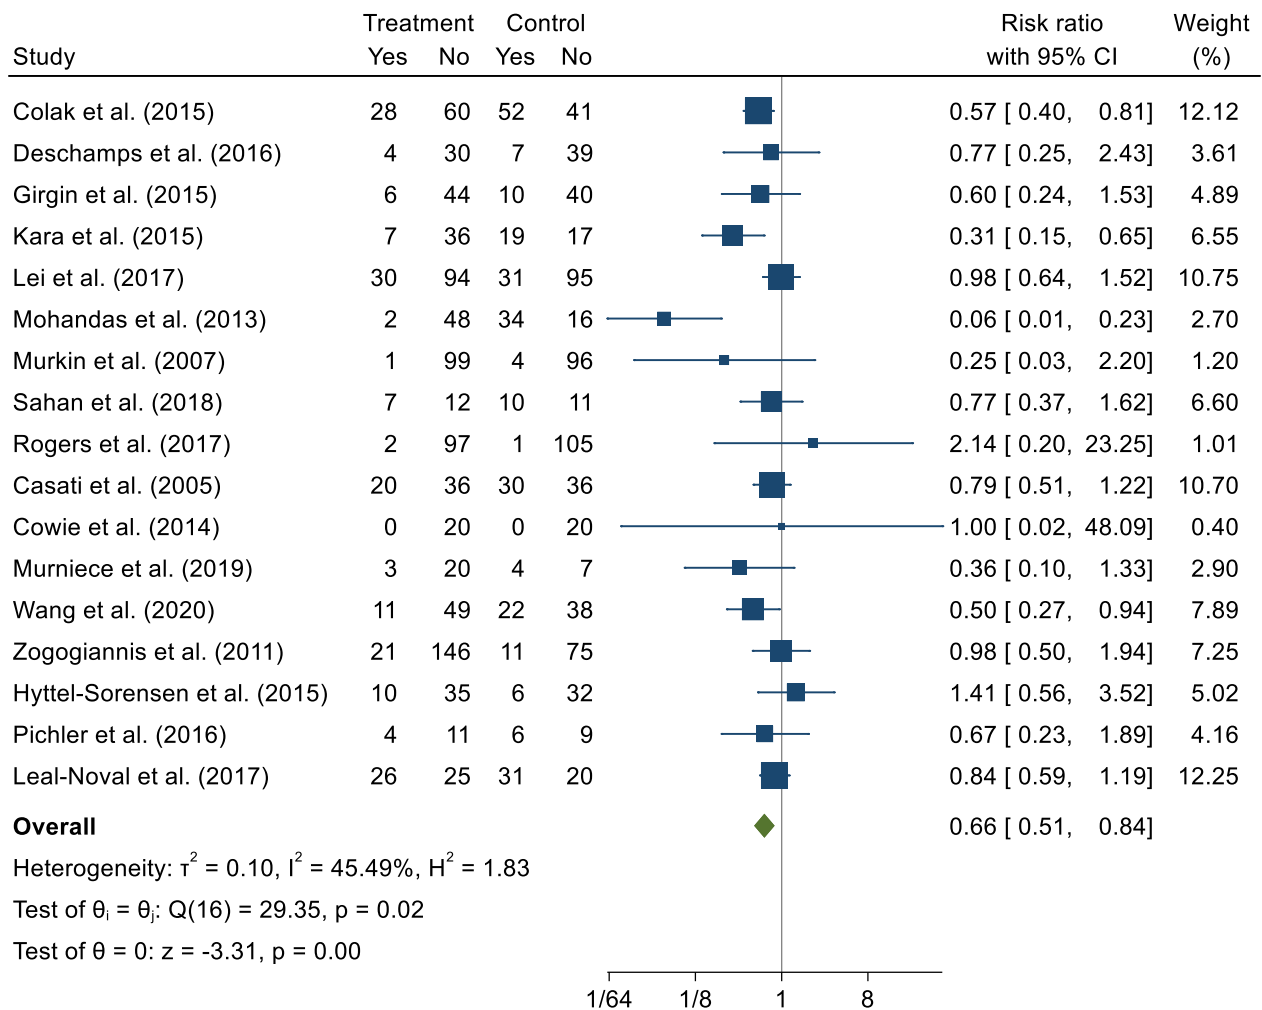

Random-effects DerSimonian–Laird model

## Sensitivity analysis

### Heterogeneity (excluding Mohandas et al. 2013)

Figure S33

Mild, moderate or severe, temporary or persistent, cognitive or neurologic deficit (excluding Mohandas et al 2013)

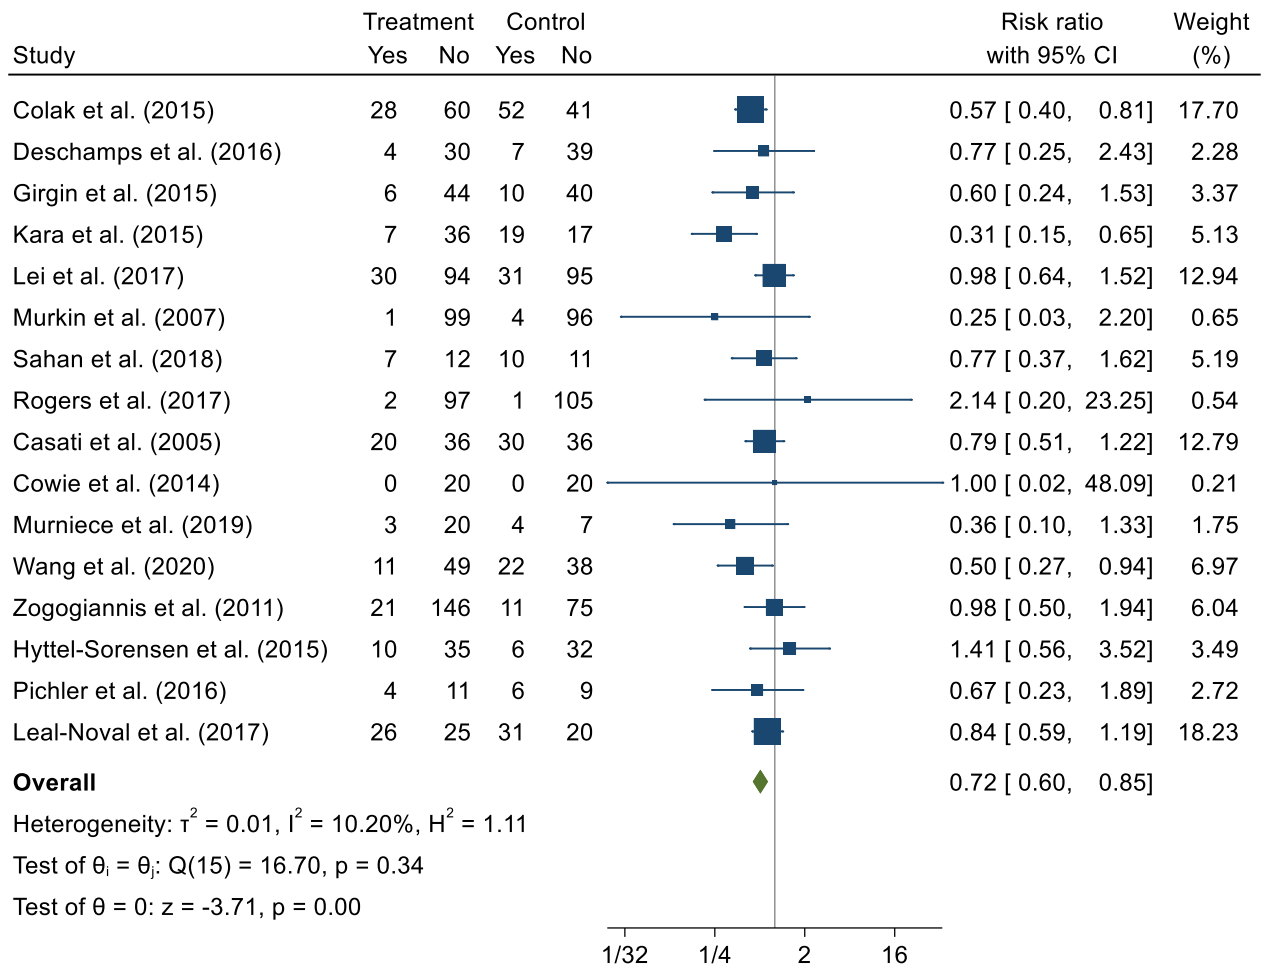

Random-effects DerSimonian–Laird model

# Brain damage on imaging at maximal follow-up

## Primary analysis

Figure S34 – fixed effect

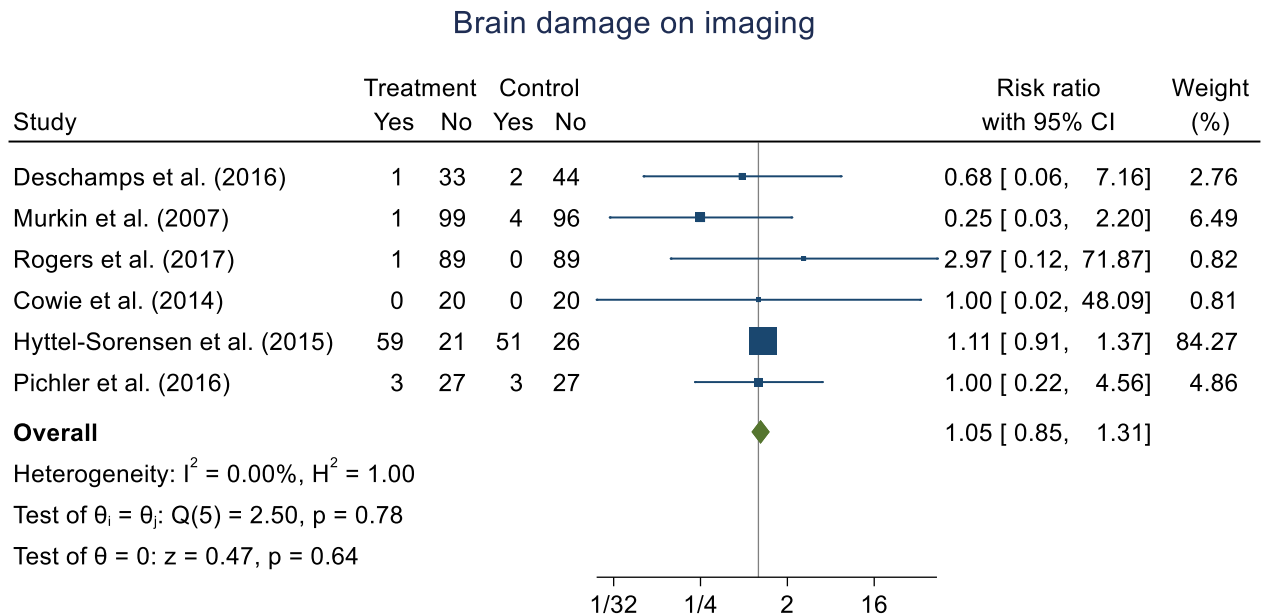

Fixed-effects Mantel–Haenszel model

Figure S35 – random effects

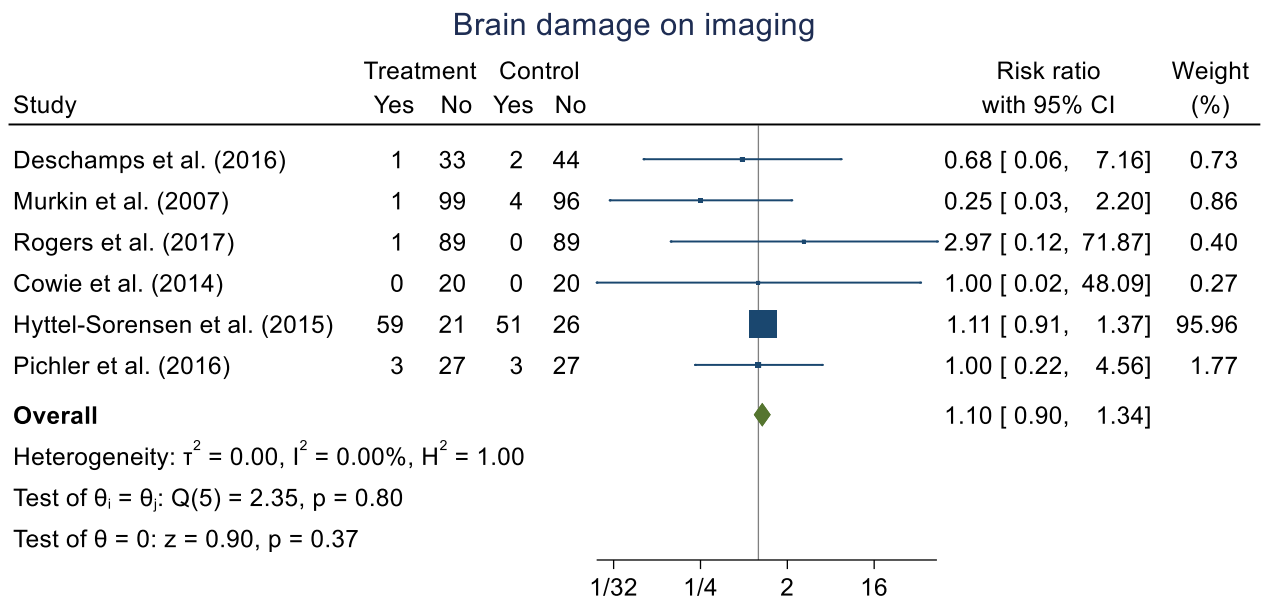

Random-effects DerSimonian–Laird model

# Proportion of participants with one or more adverse events

## Primary analysis

### Figure S36 – fixed effect

#### Proportion of participants with one or more adverse events

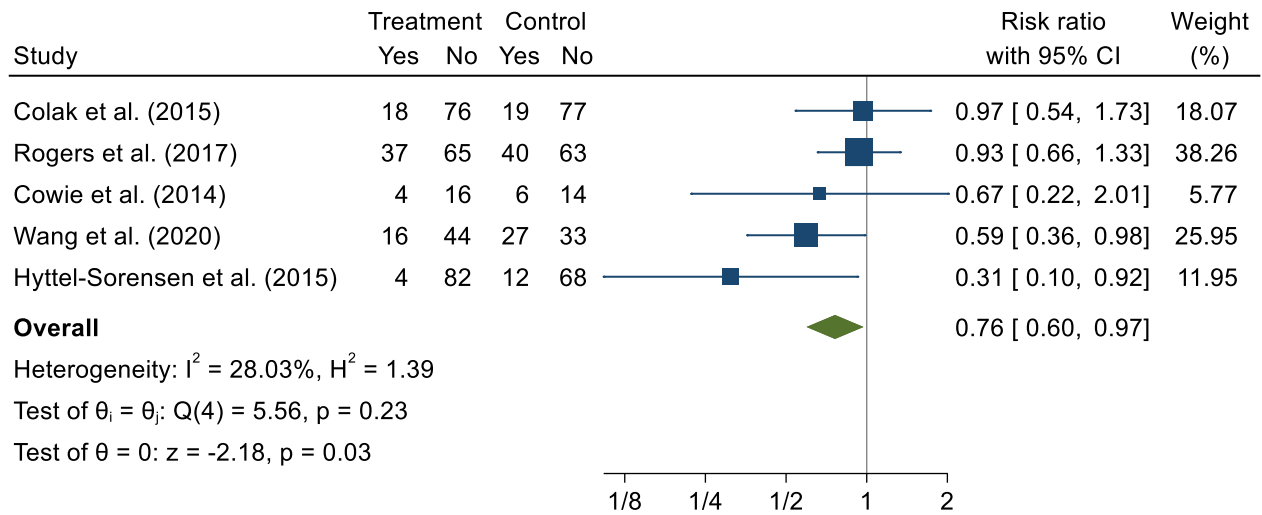

Fixed-effects Mantel–Haenszel model

### Figure S37 – random effects

#### Proportion of participants with one or more adverse events

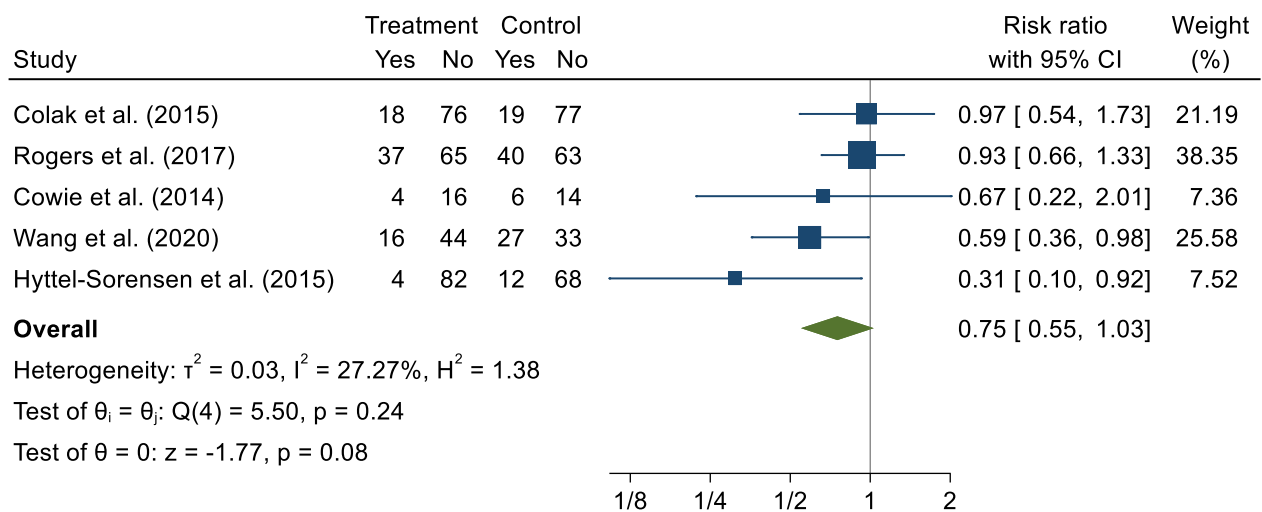

Random-effects DerSimonian–Laird model

# Any evidence of a negative impact on the brain

## Primary analysis

Figure S38 – fixed effect

### Any evidence of a negative impact on the brain

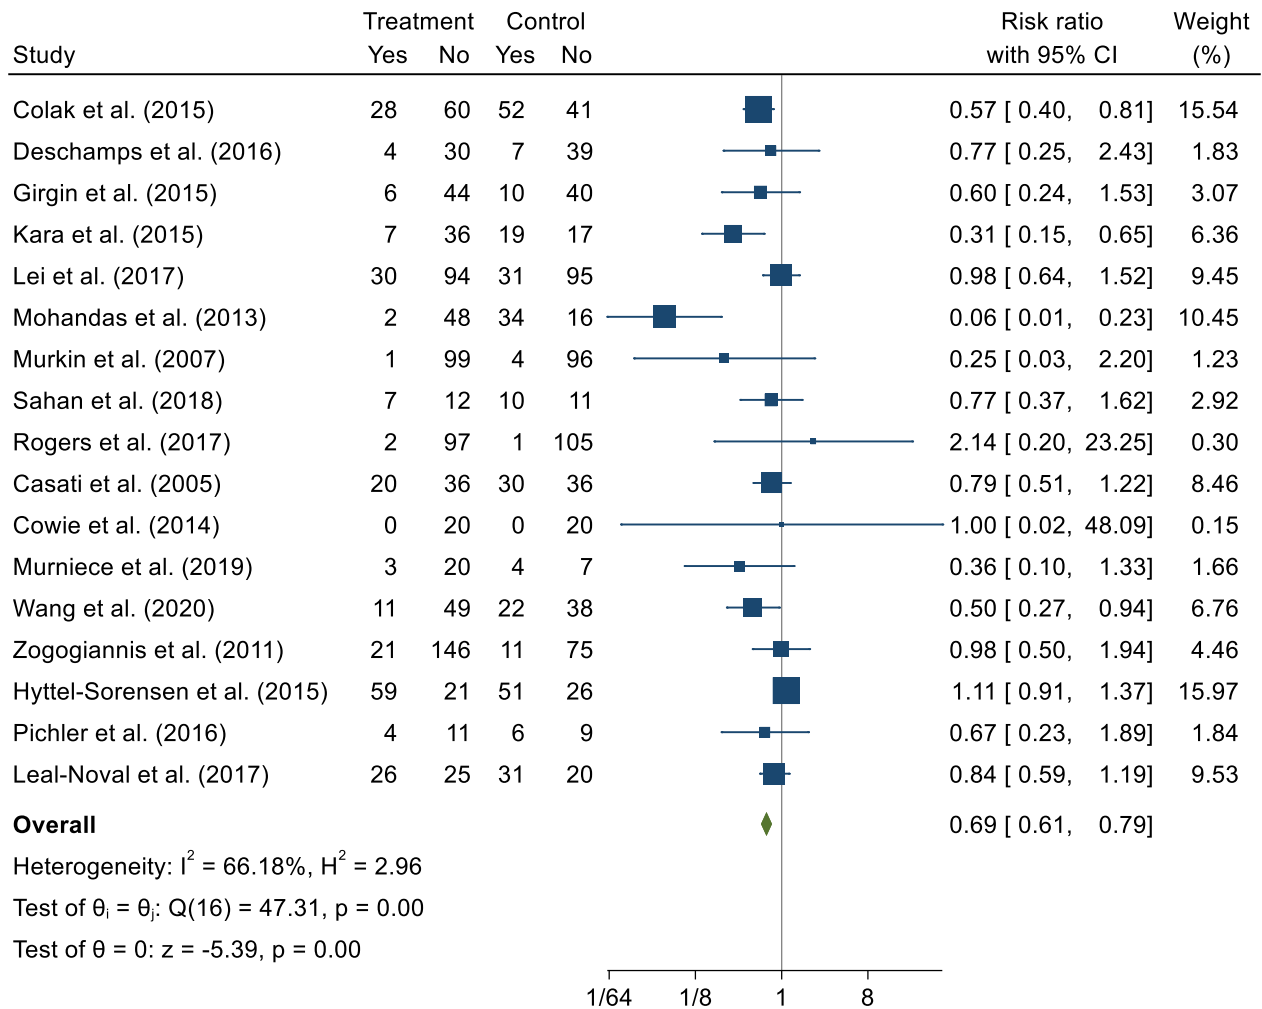

Fixed-effects Mantel-Haenszel model

Figure S39 – random effects

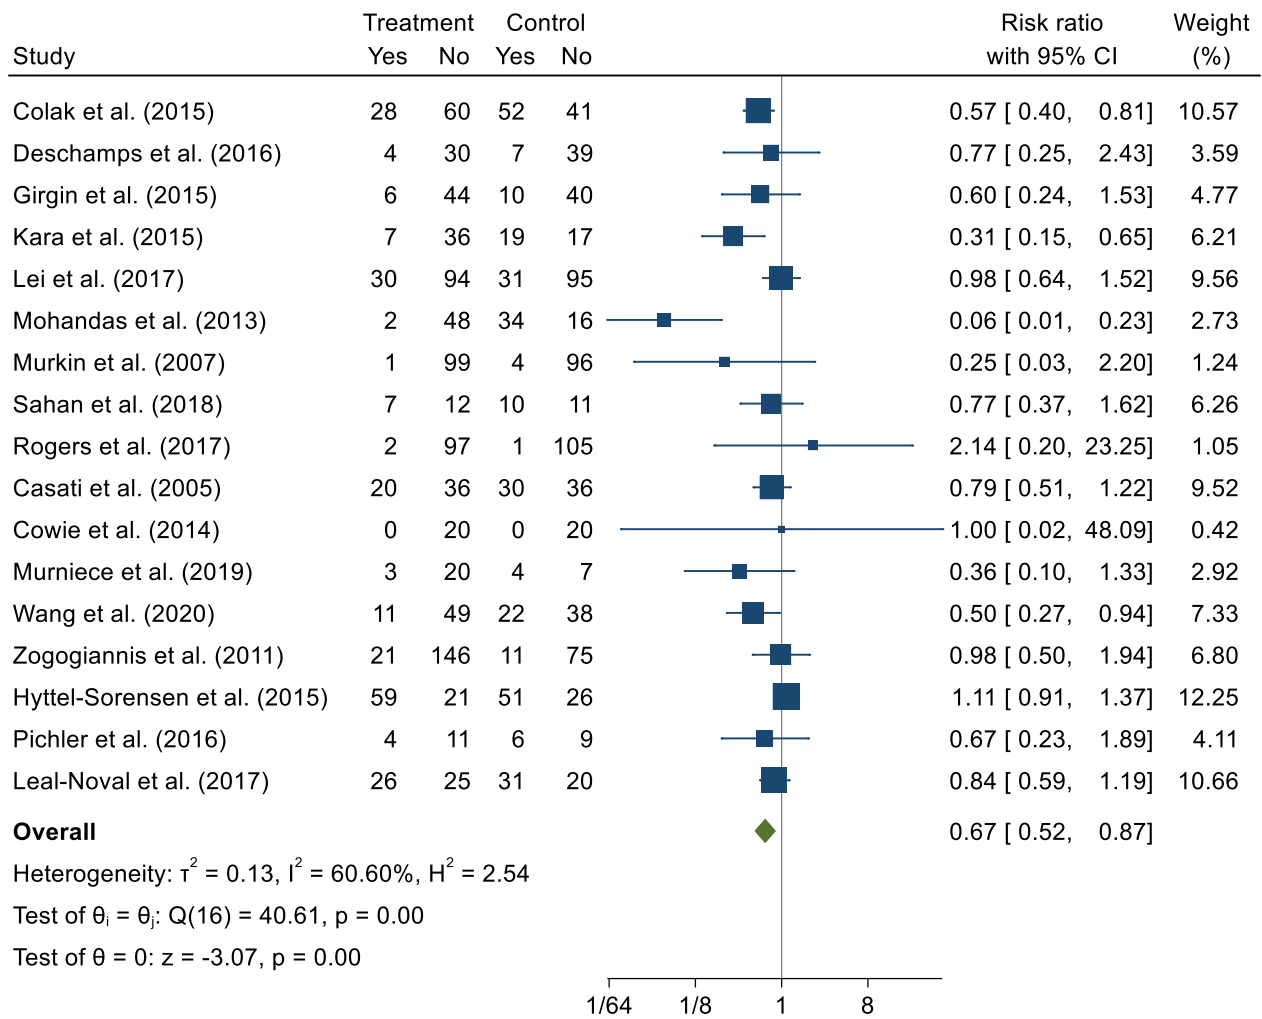

Random-effects DerSimonian–Laird model



## Sensitivity analysis

### Heterogeneity (excluding Mohandas et al. 2013)

Figure S40

Any evidence of a negative impact on the brain (excluding Mohandas et al 2013)

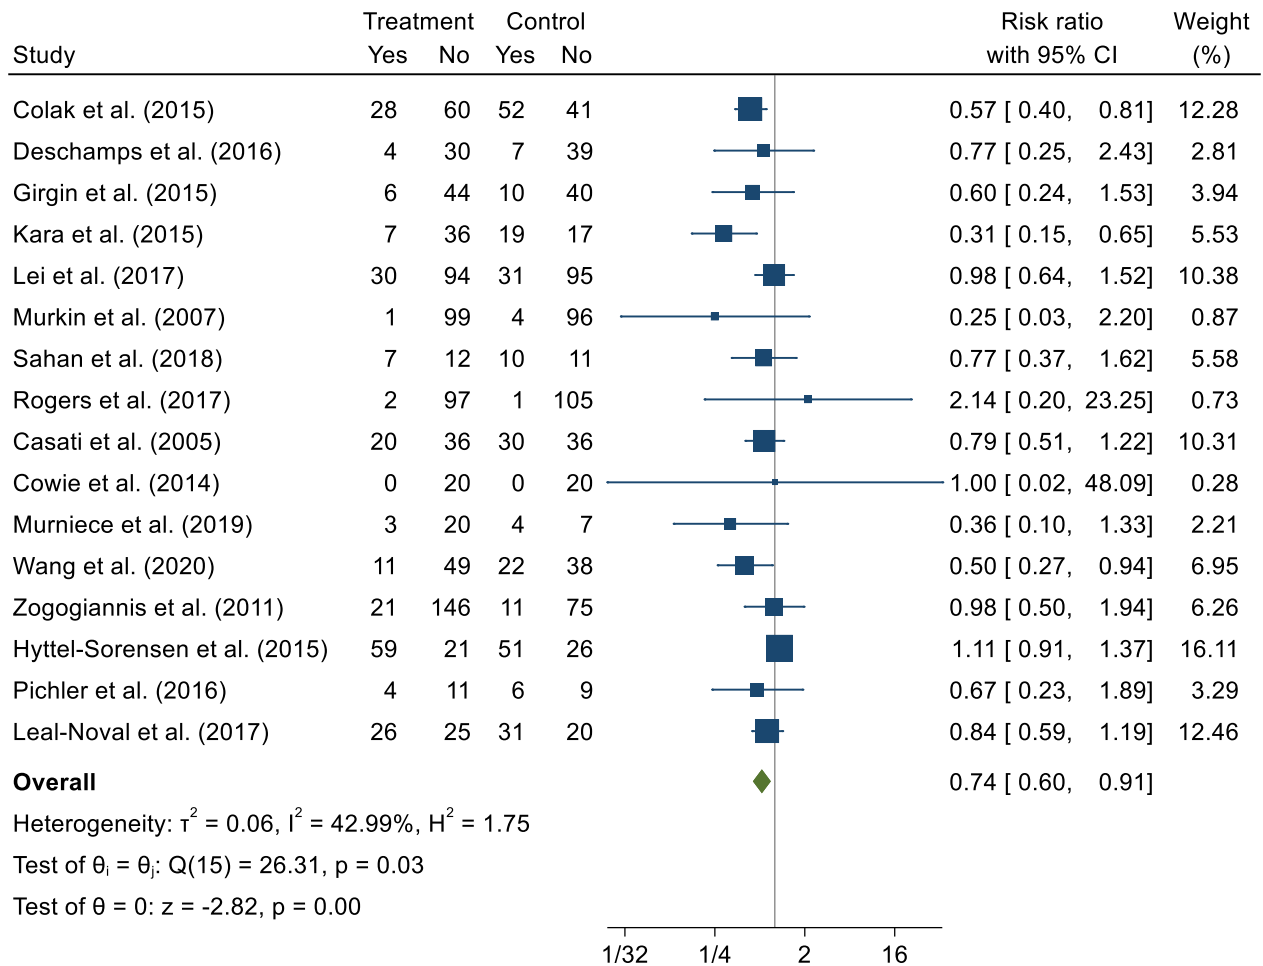

Random-effects DerSimonian–Laird model

## **Appendix E: Datafile for statistical analysis program**

Please go to

LINK FIGSHARE: <https://figshare.com/s/2b667e81c89b031f2156>

For full access to the datafile used in Stata to conduct the statistical analyses for this systematic review with meta-analysis

## Appendix F: Synthax for STATA/SE 17.0

Please go to

LINK FIGSHARE: <https://figshare.com/s/dd48f8aec10b1718e83f>

For full access to the Synthax used in Stata to conduct the statistical analyses for this systematic review with meta-analysis

## **Appendix G: Correspondence with the trialists**

Please go to

LINK FIGSHARE: <https://figshare.com/s/9bf7f10d3e82ca7924d4>

For full access to the correspondence with the trialists in order to obtain unpublished data.
